# Supplementary material for: The evolution of resource management in Taiwanese fisheries: coastal and offshore perspectives
Source: PeerJ. 2024 Nov 27;12:e18434. doi: 10.7717/peerj.18434 (PMC11608025; doi:10.7717/peerj.18434)
Supplement: Supplemental Information 1 [file peerj-12-18434-s001.xlsx]

## Sheet: 工作表1
Year	Chinese Comman Name	English Comman Name	Trophic Level	Offshore catches	Coastal catches	Total catches
2021	丁香	Silver-stripe round herring	3.06	78.571	0.019	78.59
2021	大目鮪	Bigeye tuna	3.72	114.79	0.041	114.831
2021	太平洋黑鮪	Pacific Bluefin tuna	4.05	530.269	0.363	530.632
2021	日本馬加鰆	Japanese Spanish mackerel	4.38	91.1702	91.1094	182.28
2021	正鰹	Skipjack tuna	3.32	992.217	1291.96	2284.18
2021	白姑魚	Silver croaker	4.2	298.034	296.367	594.401
2021	白帶魚	Hairtail/Largehead hairtail	3.99	10327.8	1261.09	11588.9
2021	立翅旗魚	Black marlin	4.47	426.775	219.312	646.087
2021	合齒魚科	Lizardfishes; Bombay ducks	4.346	214.931	107.49	322.421
2021	吉打副葉鰺	Shrimp scad	3.32	155.536	92.7001	248.236
2021	尖吻鯖鯊	Shortfin mako shark	4.32	4.053	0.225	4.278
2021	尖吻鱸	Barramundi/ Giant seaperch	3.83	0.2906	0.2022	0.4928
2021	刺鯧	Japanese butterfish	4	325.317	66.3177	391.635
2021	花腹鯖	Blue mackerel	4.315	62737	288.175	63025.2
2021	虱目魚	Milkfish fry	2.4	0.56052	16.2404	16.8009
2021	金線魚	Golden thread	3.77	16.7895	45.0261	61.8155
2021	長鰭鮪	Albacore	4.13	356.736	0.3467	357.083
2021	雨傘旗魚	Indd-pacific sailfish	4.5	199.373	116.524	315.896
2021	秋刀魚	Pacific saury	3.71	0	0.0015	0.0015
2021	紅目鰱	Red Big-eye	4.11	140.735	69.2641	209.999
2021	紅肉旗魚	Striped marlin	4.5	100.218	31.2085	131.426
2021	海鱺	Cobia	4.26	4.71089	7.08938	11.8003
2021	烏魚	Grey Mullet	2.48	427.148	206.824	633.972
2021	真鯊屬	Requiem sharks	4	1366.13	59.945	1426.07
2021	馬鮁科	Blackspot threadfin	4.06	94.4397	219.994	314.434
2021	鬼頭刀	Common dolphinfish	4.48	1393.35	1546.5	2939.86
2021	帶鰆科	Snake mackerels	4.19	56.4351	54.7705	111.206
2021	康氏馬加鰆	Narrow barred spanish mackerel	4.38	300.498	221.775	522.273
2021	眼眶魚	Moonfish	3.45	3054.54	52.6868	3107.22
2021	單棘魨科	Filefishes (leatherjackets)	3.49	130.261	52.4957	182.757
2021	黃背牙鯛	Yellowback sea-bream	3.7	238.892	52.42	291.312
2021	黃鰭鮪	Yellowfin tuna	4.48	1555.62	54.6855	1610.31
2021	黑皮旗魚	Indo-Pacific blue marlin	4.39	591.077	137.474	728.551
2021	黑鯛	Blackhead seabream	3.24	40.6303	241.362	281.993
2021	圓花鰹	Bullet tuna/Frigate tuna	4.27	5120.63	372.368	5493
2021	嘉臘	Red seabream	3.25	38.3945	65.2782	103.673
2021	劍旗魚	Swordfish	4.46	330.231	0.67	330.901
2021	鞍帶石斑魚	Giant grouper	4	0.098	0.262	0.36
2021	魩仔	Shorthead anchovy	1	0	876.278	876.278
2021	鋸峰齒鯊	Blue shark	4.37	571.292	10.025	581.317
2021	點帶石斑	Orange-spotted grouper	4.2	7.89169	30.8854	38.7771
2021	藍圓鰺	Japanese scad	3.4	2372.31	533.741	2906.05
2021	鎖管	Neritic squids	4	4834.6	38.0164	4872.62
2021	鯙科	Moray eels	4.38	1132.38	9.09478	1141.47
2021	鐮鯧	Silver pomfret	3.99	150.191	38.546	188.737
2020	丁香	Silver-stripe round herring	3.06	82.1	0	82.1
2020	大目鮪	Bigeye tuna	3.72	372.849	8.541	381.39
2020	太平洋黑鮪	Pacific Bluefin tuna	4.05	486.956	1.13502	488.091
2020	日本馬加鰆	Japanese Spanish mackerel	4.38	100.11	205.317	305.427
2020	正鰹	Skipjack tuna	3.32	2119.28	1209.75	3329.03
2020	白姑魚	Silver croaker	4.2	357.929	296.267	654.196
2020	白帶魚	Hairtail/Largehead hairtail	3.99	10967.1	2221.85	13189
2020	立翅旗魚	Black marlin	4.47	232.371	154.664	387.035
2020	合齒魚科	Lizardfishes; Bombay ducks	4.346	199.629	89.6945	289.324
2020	吉打副葉鰺	Shrimp scad	3.32	211.144	93.1195	304.263
2020	尖吻鯖鯊	Shortfin mako shark	4.32	58.5227	0.41342	58.9361
2020	尖吻鱸	Barramundi/ Giant seaperch	3.83	0	2.071	2.071
2020	刺鯧	Japanese butterfish	4	343.21	27.6801	370.89
2020	花腹鯖	Blue mackerel	4.315	46363.7	144.706	46508.4
2020	花鰹	Frigate tuna	4.315	155.681	441.506	597.187
2020	虱目魚	Milkfish fry	2.4	1.00283	73.5281	74.5309
2020	金線魚	Golden thread	3.77	14.471	17.9726	32.4436
2020	長鰭鮪	Albacore	4.13	335.009	0.5864	335.595
2020	雨傘旗魚	Indd-pacific sailfish	4.5	143.73	244.133	387.863
2020	秋刀魚	Pacific saury	3.71	9	0.0009	9.0009
2020	紅目鰱	Red Big-eye	4.11	127.783	34.8725	162.655
2020	紅肉旗魚	Striped marlin	4.5	80.6409	31.5508	112.192
2020	海鱺	Cobia	4.26	5.08959	6.90442	11.994
2020	烏魚	Grey Mullet	2.48	790.61	221.399	1012.01
2020	真鯊屬	Requiem sharks	4	1388.4	72.2716	1460.67
2020	真鯛	Red seabream	3.25	31.558	29.0353	60.5933
2020	鬼頭刀	Common dolphinfish	4.48	1875.89	2517.58	4393.47
2020	帶鰆科	Snake mackerels	4.19	130.546	27.5665	158.113
2020	康氏馬加鰆	Narrow barred spanish mackerel	4.38	267.41	226.497	493.907
2020	眼眶魚	Moonfish	3.45	3649.1	34.7824	3683.88
2020	單棘魨科	Filefishes (leatherjackets)	3.49	581.064	333.511	914.575
2020	黃背牙鯛	Yellowback sea-bream	3.7	173.38	60.6059	233.986
2020	黃鰭鮪	Yellowfin tuna	4.48	2225.65	85.0876	2310.73
2020	黑皮旗魚	Indo-Pacific blue marlin	4.39	814.039	137.279	951.318
2020	黑鯛	Blackhead seabream	3.24	33.8688	231.64	265.509
2020	圓花鰹	Bullet tuna/Frigate tuna	4.27	7157.17	560.312	7717.49
2020	嘉臘	Red seabream	3.25	31.558	29.0353	60.5933
2020	劍旗魚	Swordfish	4.46	434.788	2.92446	437.712
2020	鞍帶石斑魚	Giant grouper	4	0.44616	0.7155	1.16166
2020	魩仔	Shorthead anchovy	1	0.99537	895.992	896.987
2020	鋸峰齒鯊	Blue shark	4.37	1499.55	46.7186	1546.27
2020	點帶石斑	Orange-spotted grouper	4.2	17.8894	9.44224	27.3317
2020	藍圓鰺	Japanese scad	3.4	7458.19	434.799	7892.99
2020	鎖管	Neritic squids	4	4842.81	62.4979	4905.31
2020	鯙科	Moray eels	4.38	299.888	18.2671	318.156
2020	鐮鯧	Silver pomfret	3.99	140.243	44.4601	184.703
2020	鱙仔	Japanese anchovy	1	0.16082	117.982	118.142
2019	丁香	Silver-stripe round herring	3.06	24.569	0	24.569
2019	大目鮪	Bigeye tuna	3.72	462.871	0.113	462.984
2019	午仔魚	Blackspot threadfin	4.06	115.089	236.505	351.594
2019	太平洋黑鮪	Pacific Bluefin tuna	4.05	232.162	4.169	236.331
2019	日本馬加鰆	Japanese Spanish mackerel	4.38	75.6046	184.067	259.672
2019	正鰹	Skipjack tuna	3.32	1783.07	715.009	2498.08
2019	白姑魚	Silver croaker	4.2	347.265	334.413	681.678
2019	白帶魚	Hairtail/Largehead hairtail	3.99	19476.7	5266.6	24743.3
2019	立翅旗魚	Black marlin	4.47	236.143	272.653	508.796
2019	合齒魚科	Lizardfishes; Bombay ducks	4.346	358.066	98.1552	456.222
2019	吉打副葉鰺	Shrimp scad	3.32	189.964	157.122	347.086
2019	尖吻鯖鯊	Shortfin mako shark	4.32	102.593	0	102.593
2019	刺鯧	Japanese butterfish	4	140.397	23.781	164.178
2019	花腹鯖	Blue mackerel	4.315	42280.4	379.355	42659.8
2019	花鰹	Frigate tuna	4.315	179.055	167.496	346.551
2019	金線魚	Golden thread	3.77	13.2708	12.8012	26.072
2019	長鰭鮪	Albacore	4.13	553.184	0	553.184
2019	雨傘旗魚	Indd-pacific sailfish	4.5	240.745	399.065	639.811
2019	紅目鰱	Red Big-eye	4.11	474.998	124.93	599.928
2019	紅肉旗魚	Striped marlin	4.5	114.421	33.8855	148.307
2019	海鱺	Cobia	4.26	5.0292	5.43416	10.4634
2019	烏魚	Grey Mullet	2.48	1025.7	585.119	1610.82
2019	真鯊屬	Requiem sharks	4	1037.09	12.7018	1049.8
2019	鬼頭刀	Common dolphinfish	4.48	2297.58	2617.53	4915.11
2019	帶鰆科	Snake mackerels	4.19	523.948	21.8153	545.764
2019	康氏馬加鰆	Narrow barred spanish mackerel	4.38	422.493	151.464	573.956
2019	眼眶魚	Moonfish	3.45	943.018	42.2817	985.3
2019	單棘魨科	Filefishes (leatherjackets)	3.49	20.901	31.8325	52.7336
2019	黃背牙鯛	Yellowback sea-bream	3.7	331.73	935.426	1267.16
2019	黃鰭鮪	Yellowfin tuna	4.48	3185.31	33.1499	3218.46
2019	黑皮旗魚	Indo-Pacific blue marlin	4.39	973.318	120.754	1094.07
2019	黑鯛	Blackhead seabream	3.24	31.8363	249.152	280.988
2019	圓花鰹	Bullet tuna/Frigate tuna	4.27	2630.73	250.172	2880.9
2019	嘉臘	Red seabream	3.25	165.711	59.8622	225.573
2019	劍旗魚	Swordfish	4.46	540.104	2.402	542.506
2019	鞍帶石斑魚	Giant grouper	4	0	0.5685	0.5685
2019	鋸峰齒鯊	Blue shark	4.37	2182.7	48.5114	2231.21
2019	點帶石斑	Orange-spotted grouper	4.2	7.5825	23.6394	31.2219
2019	藍圓鰺	Japanese scad	3.4	14229.2	473.977	14703.2
2019	鎖管	Neritic squids	4	5394.73	84.186	5478.92
2019	鯙科	Moray eels	4.38	103.215	12.6293	115.845
2019	鐮鯧	Silver pomfret	3.99	183.95	38.4698	222.42
2018	丁香	Silver-stripe round herring	3.06	7.55	0	7.55
2018	大目鮪	Bigeye tuna	3.72	655.188	0	655.188
2018	午仔魚	Blackspot threadfin	4.06	143.989	208.634	352.623
2018	太平洋黑鮪	Pacific Bluefin tuna	4.05	155.655	1.8189	157.474
2018	日本馬加鰆	Japanese Spanish mackerel	4.38	81.4796	136.319	217.798
2018	正鰹	Skipjack tuna	3.32	2020.06	1417.53	3437.59
2018	白姑魚	Silver croaker	4.2	313.804	341.791	655.595
2018	白帶魚	Hairtail/Largehead hairtail	3.99	13185.3	2872.81	16058.1
2018	立翅旗魚	Black marlin	4.47	221.306	198.405	419.711
2018	合齒魚科	Lizardfishes; Bombay ducks	4.346	144.319	82.5446	226.864
2018	吉打副葉鰺	Shrimp scad	3.32	254.158	143.118	397.276
2018	尖吻鯖鯊	Shortfin mako shark	4.32	72.1664	0.098	72.2644
2018	尖吻鱸	Barramundi/ Giant seaperch	3.83	5.18869	9.10951	14.2982
2018	刺鯧	Japanese butterfish	4	174.318	36.4303	210.749
2018	花腹鯖	Blue mackerel	4.315	71544.7	534.981	72079.7
2018	金線魚	Golden thread	3.77	6.67511	9.00707	15.6822
2018	長鰭鮪	Albacore	4.13	696.122	0	696.122
2018	雨傘旗魚	Indd-pacific sailfish	4.5	219.944	402.238	622.182
2018	扁花鰹	Frigate tuna	3.58	259.798	340.148	599.946
2018	紅目鰱	Red Big-eye	4.11	99.9042	92.8327	192.737
2018	紅肉旗魚	Striped marlin	4.5	101.294	32.8315	134.125
2018	海鱺	Cobia	4.26	9.97043	4.48847	14.4589
2018	烏魚	Grey Mullet	2.48	964.61	167.22	1131.83
2018	鬼頭刀	Common dolphinfish	4.48	2166.72	2274.61	4441.33
2018	帶鰆科	Snake mackerels	4.19	358.1	19.4301	377.53
2018	康氏馬加鰆	Narrow barred spanish mackerel	4.38	314.949	193.379	508.329
2018	眼眶魚	Moonfish	3.45	635.667	59.8682	695.535
2018	單棘魨科	Filefishes (leatherjackets)	3.49	21.6624	37.1704	58.8328
2018	黃背牙鯛	Yellowback sea-bream	3.7	182.157	195.83	377.988
2018	黃鰭鮪	Yellowfin tuna	4.48	3295.28	24.4537	3319.73
2018	黑皮旗魚	Indo-Pacific blue marlin	4.39	1206.77	119.235	1326.01
2018	黑鯛	Blackhead seabream	3.24	52.2616	171.711	223.972
2018	圓花鰹	Bullet tuna/Frigate tuna	4.27	733.412	457.097	1190.51
2018	嘉臘	Red seabream	3.25	50	42	92
2018	劍旗魚	Swordfish	4.46	643.563	1.254	644.817
2018	鞍帶石斑魚	Giant grouper	4	0	0.518	0.518
2018	鋸峰齒鯊	Blue shark	4.37	2102.8	54.8505	2157.65
2018	點帶石斑	Orange-spotted grouper	4.2	10.3598	15.723	26.0828
2018	藍圓鰺	Japanese scad	3.4	9361.05	729.394	10090.4
2018	鎖管	Neritic squids	4	2469.39	47.2914	2516.68
2018	鯙科	Moray eels	4.38	123.582	6.14689	129.729
2018	鐮鯧	Silver pomfret	3.99	125.645	33.1009	158.746
2017	丁香	Silver-stripe round herring	3.06	16.7	0	16.7
2017	大目鮪	Bigeye tuna	3.72	426.752	0	426.752
2017	午仔魚	Blackspot threadfin	4.06	188.183	190.911	379.094
2017	太平洋黑鮪	Pacific Bluefin tuna	4.05	260.024	0.0015	260.025
2017	日本馬加鰆	Japanese Spanish mackerel	4.38	63.6803	135.515	199.195
2017	正鰹	Skipjack tuna	3.32	2339.69	1390.82	3730.51
2017	白姑魚	Silver croaker	4.2	393.602	339.964	733.567
2017	白帶魚	Hairtail/Largehead hairtail	3.99	5730.09	2339.22	8069.3
2017	立翅旗魚	Black marlin	4.47	185.597	157.597	343.194
2017	合齒魚科	Lizardfishes; Bombay ducks	4.346	137.172	90.0338	227.205
2017	吉打副葉鰺	Shrimp scad	3.32	213.65	124.186	337.836
2017	尖吻鯖鯊	Shortfin mako shark	4.32	58.261	0.092	58.353
2017	尖吻鱸	Barramundi/ Giant seaperch	3.83	0.7939	0.5579	1.3518
2017	刺鯧	Japanese butterfish	4	319.793	37.08	356.874
2017	花腹鯖	Blue mackerel	4.315	54889.8	407.115	55296.9
2017	花鰹	Frigate tuna	4.315	178.317	258.301	436.618
2017	虱目魚	Milkfish fry	2.4	0.015	14.3455	14.3605
2017	金線魚	Golden thread	3.77	10.3334	14.9388	25.2722
2017	長鰭鮪	Albacore	4.13	669.447	0	669.447
2017	雨傘旗魚	Indd-pacific sailfish	4.5	226.829	286.519	513.347
2017	紅目鰱	Red Big-eye	4.11	119.66	237.271	356.931
2017	紅肉旗魚	Striped marlin	4.5	93.3656	48.3	141.666
2017	海鱺	Cobia	4.26	12.6918	6.5632	19.255
2017	烏魚	Grey Mullet	2.48	1207.43	221.74	1429.17
2017	真鰺	Japanese jack mackerel	3.4	7912.67	642.689	8555.36
2017	鬼頭刀	Common dolphinfish	4.48	2477.79	3167.57	5645.37
2017	帶鰆科	Snake mackerels	4.19	294.694	18.906	313.6
2017	康氏馬加鰆	Narrow barred spanish mackerel	4.38	269.325	134.731	404.056
2017	眼眶魚	Moonfish	3.45	1425.06	70.9755	1496.04
2017	單棘魨科	Filefishes (leatherjackets)	3.49	83.743	34.1894	117.932
2017	黃背牙鯛	Yellowback sea-bream	3.7	290.572	398.019	688.591
2017	黃鰭鮪	Yellowfin tuna	4.48	31001.2	134.642	31135.9
2017	黑皮旗魚	Indo-Pacific blue marlin	4.39	987.818	144.962	1132.78
2017	黑鯛	Blackhead seabream	3.24	49.4773	178.422	227.899
2017	圓花鰹	Bullet tuna/Frigate tuna	4.27	4404.41	307.705	4712.12
2017	嘉臘	Red seabream	3.25	119.233	47.1186	166.351
2017	劍旗魚	Swordfish	4.46	639.807	0.209	640.016
2017	鋸峰齒鯊	Blue shark	4.37	2270.62	98.126	2368.75
2017	點帶石斑	Orange-spotted grouper	4.2	13.5188	9.709	23.2278
2017	藍圓鰺	Japanese scad	3.4	6777.97	550.105	7328.08
2017	鎖管	Neritic squids	4	6901.31	38.0362	6939.34
2017	鯙科	Moray eels	4.38	132.381	2.7952	135.176
2017	鐮鯧	Silver pomfret	3.99	93.2398	28.9926	122.232
2016	丁香	Silver-stripe round herring	3.06	16.5	0	16.5
2016	大目鮪	Bigeye tuna	3.72	417.737	8.5445	426.282
2016	午仔魚	Blackspot threadfin	4.06	212.467	371.496	583.963
2016	太平洋黑鮪	Pacific Bluefin tuna	4.05	244.01	0.416	244.426
2016	日本馬加鰆	Japanese Spanish mackerel	4.38	115.704	311.437	427.141
2016	正鰹	Skipjack tuna	3.32	1119.44	1243.86	2363.3
2016	白姑魚	Silver croaker	4.2	447.042	302.051	749.093
2016	白帶魚	Hairtail/Largehead hairtail	3.99	3975.49	2036.8	6012.29
2016	立翅旗魚	Black marlin	4.47	130.747	147.446	278.194
2016	合齒魚科	Lizardfishes; Bombay ducks	4.346	201.694	99.4771	301.171
2016	吉打副葉鰺	Shrimp scad	3.32	256.721	106.044	362.765
2016	尖吻鯖鯊	Shortfin mako shark	4.32	31.509	0.2756	31.7846
2016	尖吻鱸	Barramundi/ Giant seaperch	3.83	0.0897	1.116	1.2057
2016	刺鯧	Japanese butterfish	4	554.813	37.6624	592.475
2016	花腹鯖	Blue mackerel	4.315	58463.4	465.249	58928.6
2016	花鰹	Frigate tuna	4.315	253.367	1009.99	1263.35
2016	虱目魚	Milkfish fry	2.4	0.3608	27.6148	27.9756
2016	金線魚	Golden thread	3.77	93.7093	0.7313	94.4406
2016	長鰭鮪	Albacore	4.13	525.101	0.4135	525.515
2016	雨傘旗魚	Indd-pacific sailfish	4.5	254.316	315.014	569.33
2016	紅目鰱	Red Big-eye	4.11	196.225	132.28	328.505
2016	紅肉旗魚	Striped marlin	4.5	73.0104	24.2705	97.2809
2016	海鱺	Cobia	4.26	2.5435	10.612	13.1555
2016	烏魚	Grey Mullet	2.48	1510.95	286.781	1797.73
2016	鬼頭刀	Common dolphinfish	4.48	4288.89	728.997	5017.89
2016	帶鰆科	Snake mackerels	4.19	312.108	2.5185	314.627
2016	康氏馬加鰆	Narrow barred spanish mackerel	4.38	370.234	153.316	523.551
2016	眼眶魚	Moonfish	3.45	5696.8	190.333	5887.14
2016	單棘魨科	Filefishes (leatherjackets)	3.49	100.551	77.313	177.864
2016	黃背牙鯛	Yellowback sea-bream	3.7	373.734	167.382	541.116
2016	黃鰭鮪	Yellowfin tuna	4.48	3431.71	35.9298	3467.64
2016	黑皮旗魚	Indo-Pacific blue marlin	4.39	1153.56	187.139	1340.7
2016	黑鯛	Blackhead seabream	3.24	66.6216	161.238	227.86
2016	圓花鰹	Bullet tuna/Frigate tuna	4.27	2720.07	493.942	3214.02
2016	嘉臘	Red seabream	3.25	7006.99	563.134	7570.13
2016	劍旗魚	Swordfish	4.46	712.187	6.3166	718.503
2016	鞍帶石斑魚	Giant grouper	4	0	0.8211	0.8211
2016	鋸峰齒鯊	Blue shark	4.37	2543.23	35.771	2579
2016	點帶石斑	Orange-spotted grouper	4.2	8.0843	19.6221	27.7064
2016	藍圓鰺	Japanese scad	3.4	4851.97	202.104	5054.07
2016	鎖管	Neritic squids	4	3269.4	85.2248	3354.62
2016	鯙科	Moray eels	4.38	334.371	7.1531	341.524
2016	鐮鯧	Silver pomfret	3.99	148.995	35.9817	184.976
2015	丁香	Silver-stripe round herring	3.06	214.9	3.21	218.11
2015	大目鮪	Bigeye tuna	3.72	651.11	10.8747	661.985
2015	午仔魚	Blackspot threadfin	4.06	259.982	263.912	523.895
2015	太平洋黑鮪	Pacific Bluefin tuna	4.05	305.487	25.3934	330.881
2015	日本馬加鰆	Japanese Spanish mackerel	4.38	70.6586	168.414	239.073
2015	正鰹	Skipjack tuna	3.32	2681.88	17100.8	19782.7
2015	白姑魚	Silver croaker	4.2	436.823	351.987	788.81
2015	白帶魚	Hairtail/Largehead hairtail	3.99	2286.19	1175.68	3461.87
2015	立翅旗魚	Black marlin	4.47	244.359	190.575	434.934
2015	合齒魚科	Lizardfishes; Bombay ducks	4.346	188.159	109.365	297.524
2015	吉打副葉鰺	Shrimp scad	3.32	340.875	77.592	418.467
2015	尖吻鯖鯊	Shortfin mako shark	4.32	8.6354	0.3345	8.9699
2015	尖吻鱸	Barramundi/ Giant seaperch	3.83	0.0873	0.837	0.9243
2015	刺鯧	Japanese butterfish	4	421.481	52.369	473.85
2015	花腹鯖	Blue mackerel	4.315	62823.6	371.125	63194.7
2015	花鰹	Frigate tuna	4.315	387.909	565.678	953.588
2015	金線魚	Golden thread	3.77	47.7194	1.709	49.4284
2015	長鰭鮪	Albacore	4.13	378.507	0.94784	379.455
2015	雨傘旗魚	Indd-pacific sailfish	4.5	346.858	474.774	821.632
2015	紅目鰱	Red Big-eye	4.11	313.817	163.572	477.389
2015	紅肉旗魚	Striped marlin	4.5	97.4268	32.6822	130.109
2015	海鱺	Cobia	4.26	2.56306	18.0936	20.6566
2015	烏魚	Grey Mullet	2.48	993.16	295.74	1288.9
2015	鬼頭刀	Common dolphinfish	4.48	3463.41	639.101	4102.51
2015	帶鰆科	Snake mackerels	4.19	325.464	6.1091	331.573
2015	康氏馬加鰆	Narrow barred spanish mackerel	4.38	496.398	221.955	718.354
2015	眼眶魚	Moonfish	3.45	8205.48	153.242	8358.72
2015	單棘魨科	Filefishes (leatherjackets)	3.49	528.997	210.183	739.18
2015	黃背牙鯛	Yellowback sea-bream	3.7	191.146	119.028	310.174
2015	黃鰭鮪	Yellowfin tuna	4.48	2967.57	53.0389	3020.61
2015	黑皮旗魚	Indo-Pacific blue marlin	4.39	1324	194.15	1518.15
2015	黑鯛	Blackhead seabream	3.24	44.743	166.744	211.487
2015	圓花鰹	Bullet tuna/Frigate tuna	4.27	1534.44	810.363	2344.81
2015	嘉臘	Red seabream	3.25	3490.83	323.567	3814.4
2015	劍旗魚	Swordfish	4.46	1249.04	8.171	1257.21
2015	鞍帶石斑魚	Giant grouper	4	0	1.2123	1.2123
2015	鋸峰齒鯊	Blue shark	4.37	2298.71	37.772	2336.48
2015	點帶石斑	Orange-spotted grouper	4.2	0.046	19.0204	19.0664
2015	藍圓鰺	Japanese scad	3.4	3458.69	250.152	3708.84
2015	鎖管	Neritic squids	4	2400.96	58.2989	2459.26
2015	鯙科	Moray eels	4.38	256.297	3.2839	259.581
2015	鐮鯧	Silver pomfret	3.99	206.795	56.8003	263.596
2014	丁香	Silver-stripe round herring	3.06	520.2	0.011	520.211
2014	大目鮪	Bigeye tuna	3.72	458.607	2.7855	461.393
2014	午仔魚	Blackspot threadfin	4.06	439.358	332.637	771.995
2014	太平洋黑鮪	Pacific Bluefin tuna	4.05	235.127	41.3379	276.465
2014	日本馬加鰆	Japanese Spanish mackerel	4.38	163.119	430.485	593.604
2014	正鰹	Skipjack tuna	3.32	2550.89	1846.36	4397.25
2014	白姑魚	Silver croaker	4.2	605.342	486.182	1091.52
2014	白帶魚	Hairtail/Largehead hairtail	3.99	2377.43	1217.2	3594.63
2014	立翅旗魚	Black marlin	4.47	190.212	234.53	424.743
2014	合齒魚科	Lizardfishes; Bombay ducks	4.346	449.065	64.1782	513.243
2014	吉打副葉鰺	Shrimp scad	3.32	562.686	68.3711	631.057
2014	尖吻鯖鯊	Shortfin mako shark	4.32	9.3709	1.0623	10.4332
2014	刺鯧	Japanese butterfish	4	1345.23	100.671	1445.9
2014	花腹鯖	Blue mackerel	4.315	59131.3	552.432	59683.7
2014	金線魚	Golden thread	3.77	439.747	0.7997	440.547
2014	長鰭鮪	Albacore	4.13	193.387	2.644	196.031
2014	雨傘旗魚	Indd-pacific sailfish	4.5	227.487	339.106	566.593
2014	扁花鰹	Frigate tuna	3.58	216.076	1083.45	1299.53
2014	紅目鰱	Red Big-eye	4.11	686.135	549.311	1235.45
2014	紅肉旗魚	Striped marlin	4.5	72.9978	69.7415	142.739
2014	海鱺	Cobia	4.26	1.1625	57.963	59.1255
2014	烏魚	Grey Mullet	2.48	525.916	224.71	750.626
2014	鬼頭刀	Common dolphinfish	4.48	5087.66	1063.34	6151
2014	帶鰆科	Snake mackerels	4.19	411.477	6.10028	417.578
2014	康氏馬加鰆	Narrow barred spanish mackerel	4.38	517.187	381.065	898.252
2014	眼眶魚	Moonfish	3.45	4859.42	198.563	5057.98
2014	單棘魨科	Filefishes (leatherjackets)	3.49	125.336	407.274	532.61
2014	黃背牙鯛	Yellowback sea-bream	3.7	781.068	311.06	1092.13
2014	黃鰭鮪	Yellowfin tuna	4.48	2293.56	44.6018	2338.16
2014	黑皮旗魚	Indo-Pacific blue marlin	4.39	1570.54	139.496	1710.03
2014	黑鯛	Blackhead seabream	3.24	175.431	196.35	371.781
2014	圓花鰹	Bullet tuna/Frigate tuna	4.27	1449.58	809.193	2258.78
2014	嘉臘	Red seabream	3.25	9537.75	342.492	9880.24
2014	劍旗魚	Swordfish	4.46	1036.01	7.7235	1043.73
2014	鞍帶石斑魚	Giant grouper	4	0	0.791	0.791
2014	鋸峰齒鯊	Blue shark	4.37	1983.99	24.7961	2008.79
2014	點帶石斑	Orange-spotted grouper	4.2	6.154	4.5966	10.7506
2014	藍圓鰺	Japanese scad	3.4	843.495	504.394	1347.89
2014	鎖管	Neritic squids	4	3222.57	119.641	3342.21
2014	鯙科	Moray eels	4.38	701.02	6.1631	707.183
2014	鐮鯧	Silver pomfret	3.99	412.709	86.3998	499.109
2013	丁香	Silver-stripe round herring	3.06	86.2	12.9478	99.1478
2013	土拖鰆	Narrow barred spanish mackerel	4.48	1002.82	378.987	1381.81
2013	大目鮪	Bigeye tuna	3.72	364.1	1.9914	366.092
2013	大鯊	Sharks	3.64	2256.11	91.853	2347.97
2013	午仔魚	Blackspot threadfin	4.06	534.111	295.138	829.249
2013	正鰹	Skipjack tuna	3.32	4808.44	985.838	5794.28
2013	甘仔鰺	Malabar trevally	4.47	386.207	32.4936	418.7
2013	白皮旗魚	Black marlin	3.72	207.507	242.115	449.622
2013	白姑魚	Silver croaker	4.2	686.784	564.923	1251.71
2013	白帶魚	Hairtail/Largehead hairtail	3.99	2041.32	1299.11	3340.43
2013	肉魚	Japanese butterfish	4	1372.51	49.1538	1421.67
2013	赤鯮	Yellow seabream	3.7	749.485	369.813	1119.3
2013	油魚	Oilfish	2.28	460.082	6.987	467.069
2013	狗母	Slender lizardfish	4.346	495.891	43.9395	539.83
2013	花腹鯖	Blue mackerel	4.315	52357.5	1369.84	53727.3
2013	花鰹	Frigate tuna	4.315	114.308	453.838	568.146
2013	金線魚	Golden thread	3.77	401.513	0.261	401.774
2013	長鰭鮪	Albacore	4.13	247.186	1.0755	248.262
2013	雨傘旗魚	Indd-pacific sailfish	4.5	212.263	275.408	487.671
2013	紅目鰱	Red Big-eye	4.11	752.795	526.297	1279.09
2013	紅目鱸	Sand Bass	4.02	4.591	0.0048	4.5958
2013	紅肉旗魚	Striped marlin	4.5	77.726	220.146	297.872
2013	剝皮魚	Unicorn leatherjacket filefish	3.49	103.091	429.41	532.501
2013	海鰻	White-margined moray	4.38	753.938	39.1008	793.039
2013	海鱺	Cobia	4.26	0.2015	81.3188	81.5203
2013	烏魚	Grey Mullet	2.48	513.541	143.857	657.398
2013	馬加鰆	Japanese Spanish mackerel	4.38	253.192	528.491	781.684
2013	鬼頭刀	Common dolphinfish	4.48	3741.96	853.049	4595.01
2013	眼眶魚	Moonfish	3.45	5153.14	37.0866	5190.22
2013	黃鰭鮪	Yellowfin tuna	4.48	2657.2	63.701	2720.9
2013	黑皮旗魚	Indo-Pacific blue marlin	4.39	1851.03	23.1134	1874.14
2013	黑鮪	Bluefin tuna	4.05	148.647	2.9863	151.633
2013	黑鯊	Requiem sharks	4	19.7053	1.2179	20.9232
2013	黑鯛	Blackhead seabream	3.24	152.417	233.494	385.911
2013	黑鯧	Black pomfret	2.93	134.715	85.9391	220.654
2013	圓花鰹	Bullet tuna/Frigate tuna	4.27	1097.13	891.342	1988.47
2013	圓鰺	mackerel scad	3.4	1266.24	422.923	1689.16
2013	嘉臘	Red seabream	3.25	7456.28	132.91	7589.19
2013	劍旗魚	Swordfish	4.46	752.021	9.901	761.922
2013	魷魚	Squids	4	3.3442	1.8482	5.1924
2013	鎖管	Neritic squids	4	2370.52	1408.51	3779.03
2013	鯊條	Japanese topeshark	4	267.429	89.7088	357.138
2013	鱠	Malabar grouper	4.2	294.47	95.1003	389.57
2013	鱸魚	Japanese seabass	3.36	28.8555	3.9544	32.8099
2012	丁香	Silver-stripe round herring	3.06	46.7	0	46.7
2012	土拖鰆	Narrow barred spanish mackerel	4.48	508.099	337.213	845.312
2012	大目鮪	Bigeye tuna	3.72	420.738	0.9525	421.69
2012	大鯊	Sharks	3.64	2133.83	50.3418	2184.17
2012	午仔魚	Blackspot threadfin	4.06	339.286	280.512	619.798
2012	正鰹	Skipjack tuna	3.32	4275.99	3340.62	7616.61
2012	甘仔鰺	Malabar trevally	4.47	455.624	53.9269	509.551
2012	白皮旗魚	Black marlin	3.72	205.502	245.269	450.771
2012	白姑魚	Silver croaker	4.2	665.585	1005.68	1671.27
2012	白帶魚	Hairtail/Largehead hairtail	3.99	2398.95	1733.03	4131.98
2012	肉魚	Japanese butterfish	4	1260.42	41.9282	1302.34
2012	赤鯮	Yellow seabream	3.7	1004	273.49	1277.49
2012	油魚	Oilfish	2.28	332.552	9.915	342.467
2012	狗母	Slender lizardfish	4.346	369.457	36.4068	405.864
2012	花腹鯖	Blue mackerel	4.315	67895.9	2196.65	70092.5
2012	花鰹	Frigate tuna	4.315	5370.55	755.645	6126.2
2012	金線魚	Golden thread	3.77	374.858	0.177	375.035
2012	長鰭鮪	Albacore	4.13	326.16	3.2042	329.364
2012	雨傘旗魚	Indd-pacific sailfish	4.5	315.922	459.372	775.294
2012	紅目鰱	Red Big-eye	4.11	522.109	305.357	827.466
2012	紅肉旗魚	Striped marlin	4.5	134.526	148.407	282.933
2012	剝皮魚	Unicorn leatherjacket filefish	3.49	107.726	139.74	247.466
2012	海鰻	White-margined moray	4.38	544.65	37.1889	581.839
2012	海鱺	Cobia	4.26	0.07	61.3417	61.4117
2012	烏魚	Grey Mullet	2.48	755.936	572.304	1328.24
2012	馬加鰆	Japanese Spanish mackerel	4.38	360.545	932.888	1293.43
2012	鬼頭刀	Common dolphinfish	4.48	4060.32	568.667	4628.98
2012	眼眶魚	Moonfish	3.45	2142.28	51.2691	2193.55
2012	黃鰭鮪	Yellowfin tuna	4.48	2955.04	72.1533	3027.19
2012	黑皮旗魚	Indo-Pacific blue marlin	4.39	1795.22	40.595	1835.81
2012	黑鮪	Bluefin tuna	4.05	81.649	2.3683	84.0173
2012	黑鯊	Requiem sharks	4	41.895	8.7898	50.6848
2012	黑鯛	Blackhead seabream	3.24	135.483	221.602	357.085
2012	黑鯧	Black pomfret	2.93	90.1049	87.2756	177.381
2012	圓花鰹	Bullet tuna/Frigate tuna	4.27	2336.87	423.311	2760.18
2012	圓鰺	mackerel scad	3.4	1706.92	573.471	2280.4
2012	嘉臘	Red seabream	3.25	8393.52	216.604	8610.12
2012	劍旗魚	Swordfish	4.46	735.31	47.3673	782.677
2012	魷魚	Squids	4	3.935	7.6375	11.5725
2012	鎖管	Neritic squids	4	2331.11	1678.17	4009.28
2012	鱠	Malabar grouper	4.2	222.481	87.3912	309.872
2012	鱸魚	Japanese seabass	3.36	48.864	10.0195	58.8835
2011	丁香	Silver-stripe round herring	3.06	88.029	0	88.029
2011	土拖鰆	Narrow barred spanish mackerel	4.48	399.303	236.828	636.132
2011	大目鮪	Bigeye tuna	3.72	195.344	0.923	196.267
2011	大黃魚	Large yellow croaker	4.48	6.5065	12.8906	19.3971
2011	大鯊	Sharks	3.64	2667.89	201.519	2869.41
2011	小黃魚	Small yellow croaker	3.63	61.8755	31.8684	93.7439
2011	午仔魚	Blackspot threadfin	4.06	372.381	231.1	603.482
2011	正鰹	Skipjack tuna	3.32	4370.06	1000.39	5370.45
2011	甘仔鰺	Malabar trevally	4.47	331.342	52.9741	384.316
2011	白皮旗魚	Black marlin	3.72	222.009	204.864	426.873
2011	白姑魚	Silver croaker	4.2	786.749	470.986	1257.73
2011	白帶魚	Hairtail/Largehead hairtail	3.99	2439.16	1582.87	4022.03
2011	白鯧	Silver pomfret	3.3	2100.42	110.429	2210.85
2011	尖鮻	Great barracuda	4.19	244.1	158.31	402.41
2011	肉魚	Japanese butterfish	4	1544.47	44.4263	1588.89
2011	西刀	Dorab wolf herring	4.4	1.5458	0	1.5458
2011	沙鮻	Asian sillago	3.31	50.5586	31.6251	82.1837
2011	赤海	Two-spot red snapper	3.74	4.224	8.9993	13.2233
2011	赤鯮	Yellow seabream	3.7	677.201	345.26	1022.46
2011	油魚	Oilfish	2.28	243.665	10.7054	254.37
2011	狗母	Slender lizardfish	4.346	529.513	38.4506	567.964
2011	花腹鯖	Blue mackerel	4.315	95310.4	3293.22	98603.7
2011	花鰹	Frigate tuna	4.315	67.1006	577.701	644.801
2011	虱目魚	Milkfish fry	2.4	1.233	2.9226	4.1556
2011	金線魚	Golden thread	3.77	427.45	1.1436	428.594
2011	長鰭鮪	Albacore	4.13	135.23	0.7963	136.026
2011	雨傘旗魚	Indd-pacific sailfish	4.5	383.671	563.1	946.772
2011	青鱗	Sind sardinella	2.58	240.187	78.1918	318.378
2011	扁甲鰺	Torpedo scad	3.91	153.487	11.302	164.789
2011	秋姑	Dash-and-dot goatfish	3.61	33.066	3.4438	36.5098
2011	紅甘鰺	Greater amberjack	4.5	74.899	51.7505	126.65
2011	紅目鰱	Red Big-eye	4.11	604.39	416.13	1020.52
2011	紅肉旗魚	Striped marlin	4.5	126.586	122.898	249.484
2011	紅尾鰺	Redtail scad	3.4	158.974	134.108	293.082
2011	飛魚	Whitefih flying fish	3.25	40.1001	50.0205	90.1206
2011	剝皮魚	Unicorn leatherjacket filefish	3.49	124.909	152.425	277.334
2011	海鯰	Sea catfish/Spotted sea catfish	3.36	73.8673	54.82	128.687
2011	海鰻	White-margined moray	4.38	701.011	41.2669	742.278
2011	海鱺	Cobia	4.26	0.006	63.9098	63.9158
2011	烏魚	Grey Mullet	2.48	220.564	263.114	483.679
2011	烏賊	Cuttle fishes	2.9	436.563	186.585	623.148
2011	臭肉鰮	Round herring	2.48	284.838	96.9158	381.754
2011	馬加鰆	Japanese Spanish mackerel	4.38	310.318	339.968	650.286
2011	馬頭	Horsehead tilefish	3.4	5.0218	37.104	42.1258
2011	鬼頭刀	Common dolphinfish	4.48	112.808	50.2371	163.046
2011	眼眶魚	Moonfish	3.45	2094.59	9.6106	2104.2
2011	章魚	Octopus	3.35	91.1995	1.6818	92.8813
2011	笛鯛類	Snappers / Brownstripe	3	5.803	60.9043	66.7073
2011	黃鰭鮪	Yellowfin tuna	4.48	2688.33	35.0348	2723.36
2011	黑口	Blackmouth croaker	3.96	406.172	35.5468	441.719
2011	黑皮旗魚	Indo-Pacific blue marlin	4.39	1963.97	36.5052	2000.47
2011	黑鮪	Bluefin tuna	4.05	100.754	23.113	123.867
2011	黑鯊	Requiem sharks	4	71.6	0	71.6
2011	黑鯛	Blackhead seabream	3.24	156.168	227.606	383.774
2011	黑鯧	Black pomfret	2.93	96.716	72.584	169.3
2011	圓花鰹	Bullet tuna/Frigate tuna	4.27	4115.16	124.371	4239.53
2011	圓鰺	mackerel scad	3.4	7355.59	319.491	7675.08
2011	嘉臘	Red seabream	3.25	9792.16	156.261	9948.42
2011	銀紋笛鯛	Mangrove red snapper	3.58	1.323	0	1.323
2011	劍旗魚	Swordfish	4.46	579.397	68.886	648.283
2011	盤仔	Threadfin porgy	3.27	63.529	34.32	97.849
2011	魷魚	Squids	4	3	5.624	8.624
2011	龍尖	Trumpet emperor	3.64	23.28	0.4478	23.7278
2011	闊腹鰆	Korean seerfish	4.21	175.1	161.452	336.552
2011	翻車魨	Ocean sunfish	3.5	0.065	553.115	553.18
2011	鎖管	Neritic squids	4	2093.26	1446.32	3539.58
2011	鮸魚	Mi-iuy croaker	3.5	218.587	170.843	389.429
2011	鯊條	Japanese topeshark	4	312.974	110.402	423.376
2011	鰈類	righteye flounders	3.79	261.44	37.154	298.594
2011	鰶	Japanese gizzard shad	2.35	1.789	12.1865	13.9755
2011	鱙仔	Japanese anchovy	1	0	35.7056	35.7056
2011	鱝	Skates and rays	3.38833	3240.27	491.932	3732.2
2011	鱠	Malabar grouper	4.2	245.679	81.2114	326.891
2011	鱸魚	Japanese seabass	3.36	72.0015	14.846	86.8475
2011	鸚哥魚	Blue-barred orange parrotfish/ Bicolor parrofish	2	34.31	28.9731	63.2831
2010	丁香	Silver-stripe round herring	3.06	58.7	0	58.7
2010	土拖鰆	Narrow barred spanish mackerel	4.48	594.672	258.391	853.063
2010	大目鮪	Bigeye tuna	3.72	161.214	0	161.214
2010	大黃魚	Large yellow croaker	4.48	33.2402	5.1345	38.3747
2010	大鯊	Sharks	3.64	2302.84	141.101	2443.94
2010	小黃魚	Small yellow croaker	3.63	56.666	44.3935	101.059
2010	午仔魚	Blackspot threadfin	4.06	406.361	325.082	731.443
2010	正鰹	Skipjack tuna	3.32	495.109	3672.43	4167.54
2010	甘仔鰺	Malabar trevally	4.47	285.759	54.2932	340.052
2010	白皮旗魚	Black marlin	3.72	212.455	241.985	454.44
2010	白姑魚	Silver croaker	4.2	653.437	637.908	1291.35
2010	白帶魚	Hairtail/Largehead hairtail	3.99	3009.22	1940.55	4949.77
2010	白鯧	Silver pomfret	3.3	258.21	178.279	436.489
2010	尖鮻	Great barracuda	4.19	173.276	229.669	402.945
2010	肉魚	Japanese butterfish	4	1402.28	77.2295	1479.51
2010	沙鮻	Asian sillago	3.31	10.4062	26.8051	37.2113
2010	赤海	Two-spot red snapper	3.74	1.029	19.094	20.123
2010	赤鯮	Yellow seabream	3.7	725.327	416.831	1142.16
2010	油魚	Oilfish	2.28	125.957	6.022	131.979
2010	狗母	Slender lizardfish	4.346	395.111	114.555	509.666
2010	花腹鯖	Blue mackerel	4.315	59161.5	3024.96	62186.5
2010	花鰹	Frigate tuna	4.315	16.416	531.67	548.086
2010	虱目魚	Milkfish fry	2.4	1.817	12.426	14.243
2010	金線魚	Golden thread	3.77	481.202	4.7279	485.93
2010	長鰭鮪	Albacore	4.13	165.708	0.262	165.97
2010	雨傘旗魚	Indd-pacific sailfish	4.5	329.748	673.202	1002.95
2010	青鱗	Sind sardinella	2.58	1.938	65.817	67.755
2010	扁甲鰺	Torpedo scad	3.91	47.3507	30.1355	77.4862
2010	秋姑	Dash-and-dot goatfish	3.61	47.113	5.7002	52.8132
2010	紅甘鰺	Greater amberjack	4.5	38.53	66.345	104.875
2010	紅目鰱	Red Big-eye	4.11	575.493	447.654	1023.15
2010	紅肉旗魚	Striped marlin	4.5	95.582	171.5	267.082
2010	紅尾鰺	Redtail scad	3.4	2.5916	151.159	153.751
2010	飛魚	Whitefih flying fish	3.25	34.366	49.2654	83.6314
2010	剝皮魚	Unicorn leatherjacket filefish	3.49	108.986	177.856	286.842
2010	海鯰	Sea catfish/Spotted sea catfish	3.36	69.692	87.713	157.405
2010	海鰻	White-margined moray	4.38	660.74	40.6665	701.406
2010	海鱺	Cobia	4.26	4.956	63.4426	68.3986
2010	烏魚	Grey Mullet	2.48	86.738	98.4853	185.223
2010	烏賊	Cuttle fishes	2.9	277.852	206.733	484.585
2010	臭肉鰮	Round herring	2.48	197.1	33.4545	230.555
2010	馬加鰆	Japanese Spanish mackerel	4.38	250.457	259.005	509.462
2010	馬頭	Horsehead tilefish	3.4	4.092	43.6632	47.7552
2010	眼眶魚	Moonfish	3.45	1480.3	141.699	1622
2010	章魚	Octopus	3.35	65.516	4.0581	69.5741
2010	笛鯛類	Snappers / Brownstripe	3	6.398	90.6015	96.9995
2010	黃鰭鮪	Yellowfin tuna	4.48	3745.43	35.441	3780.87
2010	黑口	Blackmouth croaker	3.96	275.003	89.1198	364.123
2010	黑皮旗魚	Indo-Pacific blue marlin	4.39	2221.44	42.518	2263.96
2010	黑鮪	Bluefin tuna	4.05	145.029	36.5901	181.619
2010	黑鯊	Requiem sharks	4	75.228	0	75.228
2010	黑鯛	Blackhead seabream	3.24	129.483	235.359	364.842
2010	黑鯧	Black pomfret	2.93	139.962	80.1979	220.159
2010	圓花鰹	Bullet tuna/Frigate tuna	4.27	4078.27	118.634	4196.91
2010	圓鰺	mackerel scad	3.4	8651.42	592.479	9243.9
2010	嘉臘	Red seabream	3.25	5658.9	315.054	5973.96
2010	劍旗魚	Swordfish	4.46	454.37	50.931	505.301
2010	盤仔	Threadfin porgy	3.27	64.0705	57.5415	121.612
2010	魷魚	Squids	4	4.78	7.31004	12.09
2010	龍尖	Trumpet emperor	3.64	20.97	1.484	22.454
2010	闊腹鰆	Korean seerfish	4.21	154.452	181.954	336.406
2010	翻車魨	Ocean sunfish	3.5	0	533.275	533.275
2010	鎖管	Neritic squids	4	1866.49	1610.42	3476.91
2010	鮸魚	Mi-iuy croaker	3.5	212.624	200.232	412.856
2010	鯊條	Japanese topeshark	4	371.619	160.255	531.874
2010	鰈類	righteye flounders	3.79	247.88	27.9592	275.84
2010	鰶	Japanese gizzard shad	2.35	2.142	23.4985	25.6405
2010	鱙仔	Japanese anchovy	1	0	22.156	22.156
2010	鱠	Malabar grouper	4.2	188.127	91.2732	279.4
2010	鱸魚	Japanese seabass	3.36	61.736	28.9964	90.7324
2010	鸚哥魚	Blue-barred orange parrotfish/ Bicolor parrofish	2	15.2305	42.9354	58.1659
2009	丁香	Silver-stripe round herring	3.06	382.559	0	382.559
2009	土拖鰆	Narrow barred spanish mackerel	4.48	567.682	231.686	799.369
2009	大目鮪	Bigeye tuna	3.72	235.497	0.05	235.547
2009	大黃魚	Large yellow croaker	4.48	37.4584	5.895	43.3534
2009	大鯊	Sharks	3.64	2795.84	134.935	2930.78
2009	小黃魚	Small yellow croaker	3.63	68.73	40.822	109.552
2009	午仔魚	Blackspot threadfin	4.06	548.246	375.251	923.498
2009	正鰹	Skipjack tuna	3.32	908.095	2840.84	3748.93
2009	甘仔鰺	Malabar trevally	4.47	264.928	65.5515	330.479
2009	白皮旗魚	Black marlin	3.72	194.356	192.962	387.318
2009	白姑魚	Silver croaker	4.2	742.537	836.035	1578.57
2009	白帶魚	Hairtail/Largehead hairtail	3.99	3448.75	2679.8	6128.55
2009	白鯧	Silver pomfret	3.3	411.041	154.24	565.28
2009	尖鮻	Great barracuda	4.19	238.412	245.196	483.608
2009	肉魚	Japanese butterfish	4	1988.45	133.298	2121.75
2009	沙鮻	Asian sillago	3.31	29.0192	30.2513	59.2705
2009	赤海	Two-spot red snapper	3.74	0.136	2.574	2.71
2009	赤鯮	Yellow seabream	3.7	1015.13	599.162	1614.3
2009	油魚	Oilfish	2.28	147.242	0.702	147.944
2009	狗母	Slender lizardfish	4.346	585.544	73.6778	659.222
2009	花腹鯖	Blue mackerel	4.315	69094.1	2719.16	71813.3
2009	花鰹	Frigate tuna	4.315	13.719	615.1	628.819
2009	虱目魚	Milkfish fry	2.4	7.355	5.9796	13.3346
2009	金線魚	Golden thread	3.77	554.475	1.3051	555.78
2009	長鰭鮪	Albacore	4.13	129.653	0	129.653
2009	雨傘旗魚	Indd-pacific sailfish	4.5	162.036	508.648	670.684
2009	青鱗	Sind sardinella	2.58	8.43	42.927	51.357
2009	扁甲鰺	Torpedo scad	3.91	141.05	40.1319	181.182
2009	秋姑	Dash-and-dot goatfish	3.61	122.701	6.6812	129.382
2009	紅甘鰺	Greater amberjack	4.5	43.209	50.9938	94.2028
2009	紅目鰱	Red Big-eye	4.11	906.244	673.355	1579.6
2009	紅肉旗魚	Striped marlin	4.5	77.16	137.283	214.443
2009	紅尾鰺	Redtail scad	3.4	0.168	35.849	36.017
2009	飛魚	Whitefih flying fish	3.25	50.646	245.481	296.127
2009	剝皮魚	Unicorn leatherjacket filefish	3.49	151.475	673.465	824.94
2009	海鯰	Sea catfish/Spotted sea catfish	3.36	163.345	54.873	218.218
2009	海鰻	White-margined moray	4.38	835.298	64.4933	899.792
2009	海鱺	Cobia	4.26	3.2155	89.131	92.3465
2009	烏魚	Grey Mullet	2.48	126.3	134.007	260.307
2009	烏賊	Cuttle fishes	2.9	343.48	227.944	571.424
2009	臭肉鰮	Round herring	2.48	154.946	45.534	200.48
2009	馬加鰆	Japanese Spanish mackerel	4.38	201.627	422.689	624.316
2009	馬頭	Horsehead tilefish	3.4	87.234	42.3115	129.546
2009	眼眶魚	Moonfish	3.45	1010.91	103.406	1114.31
2009	章魚	Octopus	3.35	133.43	4.8428	138.273
2009	笛鯛類	Snappers / Brownstripe	3	7.418	71.3648	78.7828
2009	黃鰭鮪	Yellowfin tuna	4.48	2855.58	124.151	2979.73
2009	黑口	Blackmouth croaker	3.96	381.695	118.975	500.669
2009	黑皮旗魚	Indo-Pacific blue marlin	4.39	2081.6	26.918	2108.52
2009	黑鮪	Bluefin tuna	4.05	306.981	10.8465	317.827
2009	黑鯊	Requiem sharks	4	87.691	0	87.691
2009	黑鯛	Blackhead seabream	3.24	134.085	335.138	469.224
2009	黑鯧	Black pomfret	2.93	288.449	110.269	398.718
2009	圓花鰹	Bullet tuna/Frigate tuna	4.27	6328.22	216.351	6544.58
2009	圓鰺	mackerel scad	3.4	7516.08	379.955	7896.03
2009	嘉臘	Red seabream	3.25	4061.08	226.102	4287.18
2009	銀紋笛鯛	Mangrove red snapper	3.58	1.024	0.667	1.691
2009	劍旗魚	Swordfish	4.46	598.728	116.954	715.682
2009	盤仔	Threadfin porgy	3.27	54.399	80.5078	134.907
2009	魷魚	Squids	4	2.86	2.178	5.038
2009	龍尖	Trumpet emperor	3.64	25.71	4.1623	29.8723
2009	闊腹鰆	Korean seerfish	4.21	137.643	118.93	256.573
2009	翻車魨	Ocean sunfish	3.5	0.845	286.043	286.888
2009	鎖管	Neritic squids	4	1779	1618.67	3397.67
2009	鮸魚	Mi-iuy croaker	3.5	255.666	292.949	548.616
2009	鯊條	Japanese topeshark	4	439.084	210.266	649.35
2009	鰈類	righteye flounders	3.79	417.868	31.3441	449.212
2009	鰶	Japanese gizzard shad	2.35	1.58	15.9115	17.4915
2009	鱙仔	Japanese anchovy	1	260.991	77.127	338.118
2009	鱝	Skates and rays	3.38833	31005.9	586.128	31592.1
2009	鱠	Malabar grouper	4.2	271.351	183.125	454.476
2009	鱸魚	Japanese seabass	3.36	51.674	16.1123	67.7863
2009	鸚哥魚	Blue-barred orange parrotfish/ Bicolor parrofish	2	16.881	46.6474	63.5284
2008	丁香	Silver-stripe round herring	3.06	349.711	0	349.711
2008	土拖鰆	Narrow barred spanish mackerel	4.48	603.669	1100.49	1704.16
2008	大目鮪	Bigeye tuna	3.72	282.722	0	282.722
2008	大黃魚	Large yellow croaker	4.48	27.7968	7.458	35.2548
2008	小黃魚	Small yellow croaker	3.63	91.69	26.467	118.157
2008	午仔魚	Blackspot threadfin	4.06	517.84	643.291	1161.13
2008	正鰹	Skipjack tuna	3.32	703.705	2670.13	3373.83
2008	甘仔鰺	Malabar trevally	4.47	417.673	47.0652	464.738
2008	白皮旗魚	Black marlin	3.72	143.211	707.316	850.527
2008	白姑魚	Silver croaker	4.2	692.217	1162.29	1854.51
2008	白帶魚	Hairtail/Largehead hairtail	3.99	2909.56	2480.28	5389.84
2008	白鯧	Silver pomfret	3.3	416.063	299.706	715.769
2008	尖鮻	Great barracuda	4.19	106.874	178.927	285.801
2008	肉魚	Japanese butterfish	4	25100.2	155.151	25255.3
2008	沙鮻	Asian sillago	3.31	52.2462	33.7556	86.0018
2008	赤海	Two-spot red snapper	3.74	0.1538	8.725	8.8788
2008	赤鯮	Yellow seabream	3.7	960.165	571.301	1531.47
2008	油魚	Oilfish	2.28	145.479	0	145.479
2008	狗母	Slender lizardfish	4.346	542.064	74.5544	616.618
2008	花腹鯖	Blue mackerel	4.315	51499.5	4515.52	56015
2008	花鰹	Frigate tuna	4.315	11.91	470.407	482.317
2008	虱目魚	Milkfish fry	2.4	5.07	0.377	5.447
2008	金線魚	Golden thread	3.77	571.196	2.1195	573.316
2008	長鰭鮪	Albacore	4.13	111.199	0	111.199
2008	雨傘旗魚	Indd-pacific sailfish	4.5	212.316	639.117	851.433
2008	青鱗	Sind sardinella	2.58	81.914	49.406	131.32
2008	扁甲鰺	Torpedo scad	3.91	78.295	21.0635	99.3585
2008	秋姑	Dash-and-dot goatfish	3.61	50.7335	3.1646	53.8981
2008	紅甘鰺	Greater amberjack	4.5	40.626	45.2736	85.8996
2008	紅目鰱	Red Big-eye	4.11	717.219	539.379	1256.6
2008	紅肉旗魚	Striped marlin	4.5	64.187	211.5	275.687
2008	紅尾鰺	Redtail scad	3.4	0.808	378.492	379.3
2008	飛魚	Whitefih flying fish	3.25	19.071	66.0827	85.1537
2008	剝皮魚	Unicorn leatherjacket filefish	3.49	253.649	1043.48	1297.12
2008	海鯰	Sea catfish/Spotted sea catfish	3.36	61.2035	68.882	130.085
2008	海鰻	White-margined moray	4.38	1006.97	62.116	1069.09
2008	海鱺	Cobia	4.26	0.6063	117.412	118.018
2008	烏魚	Grey Mullet	2.48	85.9081	72.995	158.903
2008	烏賊	Cuttle fishes	2.9	302.648	236.639	539.287
2008	臭肉鰮	Round herring	2.48	274.441	26.3565	300.797
2008	馬加鰆	Japanese Spanish mackerel	4.38	302.501	202.27	504.772
2008	馬頭	Horsehead tilefish	3.4	7.69	39.6018	47.2918
2008	鬼頭刀	Common dolphinfish	4.48	5468.25	426.714	5894.96
2008	眼眶魚	Moonfish	3.45	1628.66	52.3657	1681.02
2008	章魚	Octopus	3.35	55.1076	2.928	58.0356
2008	笛鯛類	Snappers / Brownstripe	3	7.306	54.3643	61.6703
2008	黃鰭鮪	Yellowfin tuna	4.48	2728.82	32.7945	2761.62
2008	黑口	Blackmouth croaker	3.96	311.578	74.1117	385.69
2008	黑皮旗魚	Indo-Pacific blue marlin	4.39	2403.07	39.393	2442.47
2008	黑鮪	Bluefin tuna	4.05	356.946	1.2	358.146
2008	黑鯊	Requiem sharks	4	69.933	0	69.933
2008	黑鯛	Blackhead seabream	3.24	175.131	456.657	631.788
2008	黑鯧	Black pomfret	2.93	243.951	221.515	465.465
2008	圓花鰹	Bullet tuna/Frigate tuna	4.27	3699.09	857.441	4556.53
2008	圓鰺	mackerel scad	3.4	5033.65	472.552	5506.2
2008	嘉臘	Red seabream	3.25	5925.88	839.373	6765.26
2008	銀紋笛鯛	Mangrove red snapper	3.58	1.5822	3.381	4.9632
2008	劍旗魚	Swordfish	4.46	784.875	44.0024	828.877
2008	盤仔	Threadfin porgy	3.27	97.045	99.2244	196.269
2008	魩仔	Shorthead anchovy	1	41.285	479.781	521.066
2008	魷魚	Squids	4	27.2438	4.251	31.4948
2008	鮃鰈類	Flatfish /Indian halibut	3	346.736	34.5544	381.29
2008	龍尖	Trumpet emperor	3.64	26.479	3.886	30.365
2008	闊腹鰆	Korean seerfish	4.21	194.106	160.43	354.536
2008	翻車魨	Ocean sunfish	3.5	0	341.115	341.115
2008	鎖管	Neritic squids	4	1661.34	1950.73	3612.07
2008	鮸魚	Mi-iuy croaker	3.5	325.333	424.417	749.75
2008	鯊條	Japanese topeshark	4	260.684	139.482	400.167
2008	鰶	Japanese gizzard shad	2.35	2.845	18.009	20.854
2008	鱙仔	Japanese anchovy	1	39.5	7.71	47.21
2008	鱝	Skates and rays	3.38833	92.3106	71.5694	163.88
2008	鱠	Malabar grouper	4.2	194.269	106.923	301.192
2008	鱸魚	Japanese seabass	3.36	30.647	11.614	42.261
2008	鸚哥魚	Blue-barred orange parrotfish/ Bicolor parrofish	2	16.707	37.6645	54.3715
2007	丁香	Silver-stripe round herring	3.06	1022	0	1022
2007	七星鱸	Japanese seabass	4.38	11.986	5.9045	17.8905
2007	土拖鰆	Narrow barred spanish mackerel	4.48	846.515	306.533	1153.05
2007	大目鮪	Bigeye tuna	3.72	479.772	0	479.772
2007	大黃魚	Large yellow croaker	4.48	30.672	15.1001	45.7721
2007	小黃魚	Small yellow croaker	3.63	102.597	35.783	138.38
2007	午仔魚	Blackspot threadfin	4.06	488.469	679.092	1167.56
2007	正鰹	Skipjack tuna	3.32	629.866	2824.83	3454.7
2007	甘仔鰺	Malabar trevally	4.47	854.567	36.0685	890.635
2007	白皮旗魚	Black marlin	3.72	153.378	674.14	827.518
2007	白姑魚	Silver croaker	4.2	855.222	1117.4	1972.63
2007	白帶魚	Hairtail/Largehead hairtail	3.99	4036.31	2247.89	6284.2
2007	白鯧	Silver pomfret	3.3	282.2	215.771	497.971
2007	尖鮻	Great barracuda	4.19	95.126	167.993	263.119
2007	肉魚	Japanese butterfish	4	1903.33	145.647	2048.98
2007	沙鮻	Asian sillago	3.31	39.4174	46.661	86.0784
2007	赤海	Two-spot red snapper	3.74	0.35	2.8	3.15
2007	赤鯮	Yellow seabream	3.7	1145.59	620.441	1766.03
2007	油魚	Oilfish	2.28	392.107	0	392.107
2007	狗母	Slender lizardfish	4.346	618.973	92.4143	711.387
2007	花腹鯖	Blue mackerel	4.315	45127.4	4791.63	49919
2007	花鰹	Frigate tuna	4.315	17.789	548.306	566.095
2007	虱目魚	Milkfish fry	2.4	0.104	0.502	0.606
2007	金線魚	Golden thread	3.77	598.91	0.81003	599.72
2007	長鰭鮪	Albacore	4.13	128.827	0.0075	128.834
2007	雨傘旗魚	Indd-pacific sailfish	4.5	281.295	723.774	1005.07
2007	青鱗	Sind sardinella	2.58	115.102	50.895	165.997
2007	扁甲鰺	Torpedo scad	3.91	84.1036	165.562	249.666
2007	秋姑	Dash-and-dot goatfish	3.61	126.554	4.0164	130.571
2007	紅甘鰺	Greater amberjack	4.5	57.199	51.311	108.51
2007	紅目鰱	Red Big-eye	4.11	816.966	615.665	1432.63
2007	紅肉旗魚	Striped marlin	4.5	65.275	170.372	235.647
2007	紅尾鰺	Redtail scad	3.4	1.697	128.433	130.13
2007	飛魚	Whitefih flying fish	3.25	23.002	48.337	71.339
2007	剝皮魚	Unicorn leatherjacket filefish	3.49	244.408	1125.14	1369.54
2007	海鯰	Sea catfish/Spotted sea catfish	3.36	112.098	83.001	195.099
2007	海鰻	White-margined moray	4.38	1988.03	85.5093	2073.54
2007	海鱺	Cobia	4.26	0	127.26	127.26
2007	烏魚	Grey Mullet	2.48	29.111	81.7912	110.902
2007	烏賊	Cuttle fishes	2.9	381.738	338.104	719.842
2007	臭肉鰮	Round herring	2.48	244.285	27.008	271.293
2007	馬加鰆	Japanese Spanish mackerel	4.38	229.195	264.166	493.361
2007	馬頭	Horsehead tilefish	3.4	32.977	37.3399	70.3169
2007	鬼頭刀	Common dolphinfish	4.48	10018.6	577.929	10596.5
2007	眼眶魚	Moonfish	3.45	2184.42	40.7153	2225.14
2007	章魚	Octopus	3.35	83.135	2.802	85.937
2007	笛鯛類	Snappers / Brownstripe	3	3.384	54.053	57.437
2007	黃鰭鮪	Yellowfin tuna	4.48	2318.85	38.772	2357.62
2007	黑口	Blackmouth croaker	3.96	327.911	75.464	403.375
2007	黑皮旗魚	Indo-Pacific blue marlin	4.39	1992.86	34.341	2027.2
2007	黑鮪	Bluefin tuna	4.05	490.122	9.777	499.899
2007	黑鯊	Requiem sharks	4	71.566	0	71.566
2007	黑鯛	Blackhead seabream	3.24	159.343	442.87	602.213
2007	黑鯧	Black pomfret	2.93	395.835	219.11	614.945
2007	圓花鰹	Bullet tuna/Frigate tuna	4.27	1227.39	584.742	1812.13
2007	圓鰺	mackerel scad	3.4	2919.3	591.011	3510.31
2007	嘉臘	Red seabream	3.25	4185.79	887.094	5072.88
2007	銀紋笛鯛	Mangrove red snapper	3.58	0.235	2.726	2.961
2007	劍旗魚	Swordfish	4.46	1307.21	25.373	1332.58
2007	盤仔	Threadfin porgy	3.27	63.744	94.7249	158.469
2007	魩仔	Shorthead anchovy	1	47.5715	450.046	497.618
2007	魷魚	Squids	4	10.359	14.422	24.781
2007	鮃鰈類	Flatfish /Indian halibut	3	349.59	45.1597	394.75
2007	龍尖	Trumpet emperor	3.64	121.193	3.1	124.293
2007	闊腹鰆	Korean seerfish	4.21	214.595	218.283	432.878
2007	翻車魨	Ocean sunfish	3.5	0	310.396	310.396
2007	鎖管	Neritic squids	4	3158.39	2509.21	5667.6
2007	鮸魚	Mi-iuy croaker	3.5	335.608	391.74	727.348
2007	鯊條	Japanese topeshark	4	343.737	239.035	582.772
2007	鰶	Japanese gizzard shad	2.35	0	23.6875	23.6875
2007	鱙仔	Japanese anchovy	1	235.041	117.416	352.457
2007	鱝	Skates and rays	3.38833	75.5374	55.1391	130.677
2007	鱠	Malabar grouper	4.2	264.168	115.118	379.285
2007	鱸魚	Japanese seabass	3.36	30.398	4.684	35.082
2007	鸚哥魚	Blue-barred orange parrotfish/ Bicolor parrofish	2	19.532	35.773	55.305
2006	丁香	Silver-stripe round herring	3.06	715	0	715
2006	土拖鰆	Narrow barred spanish mackerel	4.48	771.125	334.036	1105.16
2006	大目鮪	Bigeye tuna	3.72	254.887	0	254.887
2006	大黃魚	Large yellow croaker	4.48	52.082	60.877	112.959
2006	小黃魚	Small yellow croaker	3.63	103.942	70.929	174.871
2006	午仔魚	Blackspot threadfin	4.06	491.817	549.153	1040.97
2006	正鰹	Skipjack tuna	3.32	1907.04	889.11	2796.15
2006	甘仔鰺	Malabar trevally	4.47	999.554	33.8108	1033.36
2006	白皮旗魚	Black marlin	3.72	271.283	1052.45	1323.74
2006	白姑魚	Silver croaker	4.2	804.792	1231.85	2036.65
2006	白帶魚	Hairtail/Largehead hairtail	3.99	4455.62	2693.81	7149.43
2006	白鯧	Silver pomfret	3.3	701.612	217.494	919.106
2006	尖鮻	Great barracuda	4.19	109.509	172.105	281.614
2006	肉魚	Japanese butterfish	4	1911.32	158.372	2069.7
2006	沙鮻	Asian sillago	3.31	49.477	43.8654	93.3424
2006	赤海	Two-spot red snapper	3.74	0.268	4.005	4.273
2006	赤鯮	Yellow seabream	3.7	1064.27	636.6	1700.87
2006	油魚	Oilfish	2.28	297.838	1.64	299.478
2006	狗母	Slender lizardfish	4.346	623.646	97.0104	720.657
2006	花枝	Squids	3.5	334.821	142.147	476.968
2006	花腹鯖	Blue mackerel	4.315	51598.1	3169.98	54768.1
2006	花鰹	Frigate tuna	4.315	10.7738	624.334	635.108
2006	金線魚	Golden thread	3.77	773.5	4.0465	777.547
2006	長鰭鮪	Albacore	4.13	325.477	0	325.477
2006	雨傘旗魚	Indd-pacific sailfish	4.5	237.119	416.999	654.118
2006	青鱗	Sind sardinella	2.58	6.0115	42.952	48.9635
2006	扁甲鰺	Torpedo scad	3.91	82.7189	22.642	105.361
2006	秋姑	Dash-and-dot goatfish	3.61	200.138	0.612	200.75
2006	紅甘鰺	Greater amberjack	4.5	19.148	7.086	26.234
2006	紅目鰱	Red Big-eye	4.11	801.857	682.428	1484.28
2006	紅肉旗魚	Striped marlin	4.5	57.941	146.728	204.669
2006	紅尾鰺	Redtail scad	3.4	6.886	144.854	151.74
2006	飛魚	Whitefih flying fish	3.25	132.862	14.106	146.968
2006	剝皮魚	Unicorn leatherjacket filefish	3.49	861.545	1151.52	2013.06
2006	海鯰	Sea catfish/Spotted sea catfish	3.36	100.347	118.592	218.939
2006	海鰻	White-margined moray	4.38	1797.67	68.0389	1865.7
2006	海鱺	Cobia	4.26	0	126.545	126.545
2006	烏魚	Grey Mullet	2.48	82.7286	109.855	192.583
2006	烏賊	Cuttle fishes	2.9	125.891	172.434	298.325
2006	臭肉鰮	Round herring	2.48	298.658	33.191	331.849
2006	馬加鰆	Japanese Spanish mackerel	4.38	277.862	221.874	499.737
2006	馬頭	Horsehead tilefish	3.4	40.688	43.9708	84.6588
2006	鬼頭刀	Common dolphinfish	4.48	10589.3	420.721	11010
2006	眼眶魚	Moonfish	3.45	1639.6	25.0035	1664.6
2006	章魚	Octopus	3.35	45.3725	3.127	48.4995
2006	笛鯛類	Snappers / Brownstripe	3	31.913	45.281	77.194
2006	黃鰭鮪	Yellowfin tuna	4.48	2370.81	26.82	2397.63
2006	黑口	Blackmouth croaker	3.96	269.522	100.135	369.656
2006	黑皮旗魚	Indo-Pacific blue marlin	4.39	2159.39	57.493	2216.89
2006	黑鮪	Bluefin tuna	4.05	356.42	0.863	357.283
2006	黑鯊	Requiem sharks	4	62.668	0	62.668
2006	黑鯛	Blackhead seabream	3.24	197.847	439.13	636.977
2006	黑鯧	Black pomfret	2.93	340.177	204.513	544.691
2006	圓花鰹	Bullet tuna/Frigate tuna	4.27	2837.03	622.865	3459.89
2006	圓鰺	mackerel scad	3.4	3157.09	377.603	3534.7
2006	嘉臘	Red seabream	3.25	4770.27	404.887	5175.16
2006	銀紋笛鯛	Mangrove red snapper	3.58	0	34.98	34.98
2006	劍旗魚	Swordfish	4.46	1788.1	60.342	1848.44
2006	盤仔	Threadfin porgy	3.27	109.72	86.901	196.621
2006	魩仔	Shorthead anchovy	1	259.138	1233.74	1492.88
2006	魷魚	Squids	4	0.7835	14.3	15.0835
2006	鮃鰈類	Flatfish /Indian halibut	3	331.002	39.2595	370.262
2006	龍尖	Trumpet emperor	3.64	124.713	1	125.713
2006	闊腹鰆	Korean seerfish	4.21	274.342	234.1	508.442
2006	翻車魨	Ocean sunfish	3.5	0.096	303.463	303.559
2006	鎖管	Neritic squids	4	3474.07	3050.81	6524.89
2006	鮸魚	Mi-iuy croaker	3.5	648.982	353.38	1002.36
2006	鯊條	Japanese topeshark	4	368.51	580.118	948.628
2006	鰶	Japanese gizzard shad	2.35	0	30.3	30.3
2006	鱙仔	Japanese anchovy	1	275.721	179.287	455.008
2006	鱝	Skates and rays	3.38833	84.419	69.0032	153.422
2006	鱠	Malabar grouper	4.2	305.017	105.732	410.749
2006	鱸魚	Japanese seabass	3.36	48.255	9.381	57.636
2006	鸚哥魚	Blue-barred orange parrotfish/ Bicolor parrofish	2	35.695	45.586	81.281
2005	丁香	Silver-stripe round herring	3.06	917.682	0.005	917.687
2005	土拖鰆	Narrow barred spanish mackerel	4.48	1688.42	449.217	2137.63
2005	大目鮪	Bigeye tuna	3.72	462.518	0	462.518
2005	大黃魚	Large yellow croaker	4.48	33.545	89.6088	123.154
2005	小黃魚	Small yellow croaker	3.63	247.065	64.143	311.208
2005	午仔魚	Blackspot threadfin	4.06	673.475	508.498	1181.97
2005	正鰹	Skipjack tuna	3.32	2336.01	711.468	3047.48
2005	甘仔鰺	Malabar trevally	4.47	917.593	55.999	973.592
2005	白皮旗魚	Black marlin	3.72	364.713	371.974	736.687
2005	白姑魚	Silver croaker	4.2	990.96	1211.23	2202.19
2005	白帶魚	Hairtail/Largehead hairtail	3.99	4482.21	1984.43	6466.64
2005	白鯧	Silver pomfret	3.3	1312.09	219.236	1531.33
2005	尖鮻	Great barracuda	4.19	138.31	154.24	292.55
2005	肉魚	Japanese butterfish	4	2615.6	151.467	2767.07
2005	沙鮻	Asian sillago	3.31	56.904	60.795	117.699
2005	赤海	Two-spot red snapper	3.74	0.029	5.568	5.597
2005	赤鯮	Yellow seabream	3.7	1069.64	758.955	1828.6
2005	油魚	Oilfish	2.28	164.255	0	164.255
2005	狗母	Slender lizardfish	4.346	556.32	109.696	666.016
2005	花枝	Squids	3.5	594.219	229.206	823.425
2005	花腹鯖	Blue mackerel	4.315	74416.9	3372.46	77789.3
2005	花鰹	Frigate tuna	4.315	380.035	159.973	540.008
2005	金線魚	Golden thread	3.77	893.597	1.132	894.729
2005	長鰭鮪	Albacore	4.13	386.529	0	386.529
2005	雨傘旗魚	Indd-pacific sailfish	4.5	547.247	164.097	711.344
2005	青鱗	Sind sardinella	2.58	394.094	45.078	439.172
2005	扁甲鰺	Torpedo scad	3.91	129.41	28.57	157.98
2005	秋姑	Dash-and-dot goatfish	3.61	249.573	16.25	265.823
2005	紅甘鰺	Greater amberjack	4.5	10.442	0.31	10.752
2005	紅目鰱	Red Big-eye	4.11	825.739	714.269	1540.01
2005	紅肉旗魚	Striped marlin	4.5	54.379	29.838	84.217
2005	紅尾鰺	Redtail scad	3.4	13.28	27.519	40.799
2005	飛魚	Whitefih flying fish	3.25	505.959	25.753	531.712
2005	剝皮魚	Unicorn leatherjacket filefish	3.49	1714.97	2780.11	4495.09
2005	海鯰	Sea catfish/Spotted sea catfish	3.36	74.747	116.344	191.091
2005	海鰻	White-margined moray	4.38	2668.24	66.043	2734.28
2005	海鱺	Cobia	4.26	0.111	143.918	144.029
2005	烏魚	Grey Mullet	2.48	491.339	130.371	621.71
2005	烏賊	Cuttle fishes	2.9	147.91	135.158	283.068
2005	臭肉鰮	Round herring	2.48	656.189	3.969	660.158
2005	馬加鰆	Japanese Spanish mackerel	4.38	341.738	213.089	554.827
2005	馬頭	Horsehead tilefish	3.4	97.395	48.824	146.219
2005	鬼頭刀	Common dolphinfish	4.48	8886.06	228.402	9114.46
2005	眼眶魚	Moonfish	3.45	1500.1	11.67	1511.77
2005	章魚	Octopus	3.35	47.9064	3.809	51.7154
2005	笛鯛類	Snappers / Brownstripe	3	30.296	40.896	71.192
2005	黃鰭鮪	Yellowfin tuna	4.48	2714.19	16.995	2731.19
2005	黑口	Blackmouth croaker	3.96	169.044	165.718	334.762
2005	黑皮旗魚	Indo-Pacific blue marlin	4.39	2680.49	65.637	2746.13
2005	黑鮪	Bluefin tuna	4.05	444.436	1.086	445.522
2005	黑鯊	Requiem sharks	4	86.848	0	86.848
2005	黑鯛	Blackhead seabream	3.24	287.193	429.552	716.746
2005	黑鯧	Black pomfret	2.93	598.227	210.547	808.774
2005	圓花鰹	Bullet tuna/Frigate tuna	4.27	3631.95	830.981	4462.93
2005	圓鰺	Japanese scad	3.4	5521.36	452.454	5973.82
2005	嘉臘	Red seabream	3.25	7761.35	712.686	8474.04
2005	銀紋笛鯛	Mangrove red snapper	3.58	0.5	44.5	45
2005	劍旗魚	Swordfish	4.46	1147.66	23.743	1171.4
2005	盤仔	Threadfin porgy	3.27	177.727	86.5487	264.276
2005	魩仔	Shorthead anchovy	1	707.644	535.619	1243.26
2005	魷魚	Squids	4	0	30.612	30.612
2005	鮃鰈類	Flatfish /Indian halibut	3	231.837	47.946	279.783
2005	龍尖	Trumpet emperor	3.64	121.613	0.666	122.279
2005	闊腹鰆	Korean seerfish	4.21	770.448	283.644	1054.09
2005	翻車魨	Ocean sunfish	3.5	0	122.945	122.945
2005	鎖管	Neritic squids	4	6713.21	4620.13	11333.3
2005	鮸魚	Mi-iuy croaker	3.5	911.851	290.521	1202.37
2005	鯊條	Japanese topeshark	4	321.5	426.688	748.188
2005	鰶	Japanese gizzard shad	2.35	0	15.2	15.2
2005	鱙仔	Japanese anchovy	1	161.494	37.561	199.055
2005	鱝	Skates and rays	3.38833	92.4407	67.262	159.703
2005	鱠	Malabar grouper	4.2	290.261	111.478	401.739
2005	鱸魚	Japanese seabass	3.36	53.27	22.2854	75.5554
2005	鸚哥魚	Blue-barred orange parrotfish/ Bicolor parrofish	2	37.649	22.928	60.577
2004	丁香	Silver-stripe round herring	3.06	809.779	6.586	816.365
2004	土拖鰆	Narrow barred spanish mackerel	4.48	2051.84	240.835	2292.67
2004	大目鮪	Bigeye tuna	3.72	351.23	0	351.23
2004	大黃魚	Large yellow croaker	4.48	16.983	31.671	48.654
2004	小黃魚	Small yellow croaker	3.63	313.937	21.538	335.475
2004	午仔魚	Blackspot threadfin	4.06	593.264	498.497	1091.76
2004	正鰹	Skipjack tuna	3.32	3448.9	1290.6	4739.5
2004	甘仔鰺	Malabar trevally	4.47	2538.15	112.602	2650.75
2004	白皮旗魚	Black marlin	3.72	530.328	94.362	624.69
2004	白姑魚	Silver croaker	4.2	1315.14	1341.65	2656.79
2004	白帶魚	Hairtail/Largehead hairtail	3.99	4752.02	2210.14	6962.15
2004	白鯧	Silver pomfret	3.3	1383.61	216.017	1599.63
2004	尖鮻	Great barracuda	4.19	155.377	148.329	303.706
2004	肉魚	Japanese butterfish	4	3088.44	130.649	3219.09
2004	西刀	Dorab wolf herring	4.4	0	0.011	0.011
2004	沙鮻	Asian sillago	3.31	52.09	41.233	93.323
2004	赤海	Two-spot red snapper	3.74	3.163	3.546	6.709
2004	赤鯮	Yellow seabream	3.7	1342.08	812.434	2154.51
2004	油魚	Oilfish	2.28	236.198	0	236.198
2004	狗母	Slender lizardfish	4.346	630.505	118.869	749.374
2004	花枝	Squids	3.5	957.206	359.334	1316.54
2004	花腹鯖	Blue mackerel	4.315	57723.9	2838.16	60562.1
2004	花鰹	Frigate tuna	4.315	422.553	99.331	521.884
2004	虱目魚	Milkfish fry	2.4	0.01	0.103	0.113
2004	金線魚	Golden thread	3.77	972.125	3.892	976.017
2004	長鰭鮪	Albacore	4.13	7100.03	0	7100.03
2004	雨傘旗魚	Indd-pacific sailfish	4.5	396.855	74.056	470.911
2004	青鱗	Sind sardinella	2.58	28.198	30.489	58.687
2004	扁甲鰺	Torpedo scad	3.91	111.783	27.731	139.514
2004	秋姑	Dash-and-dot goatfish	3.61	277.305	3.89	281.195
2004	紅目鰱	Red Big-eye	4.11	9100.5	675.795	9776.3
2004	紅肉旗魚	Striped marlin	4.5	102.372	14.586	116.958
2004	紅尾鰺	Redtail scad	3.4	28.595	12.134	40.729
2004	飛魚	Whitefih flying fish	3.25	1075.05	21.371	1096.42
2004	剝皮魚	Unicorn leatherjacket filefish	3.49	1370.58	2033.91	3404.49
2004	海鯰	Sea catfish/Spotted sea catfish	3.36	65.403	63.758	129.161
2004	海鰻	White-margined moray	4.38	2683.08	124.043	2807.12
2004	海鱺	Cobia	4.26	3.578	151.134	154.712
2004	烏魚	Grey Mullet	2.48	1083.43	132.933	1216.36
2004	烏賊	Cuttle fishes	2.9	2.42	31.096	33.516
2004	臭肉鰮	Round herring	2.48	1568.77	5.019	1573.79
2004	馬加鰆	Japanese Spanish mackerel	4.38	349.804	190.322	540.126
2004	馬頭	Horsehead tilefish	3.4	24.465	54.618	79.083
2004	眼眶魚	Moonfish	3.45	2212.52	10.3824	2222.91
2004	章魚	Octopus	3.35	135.062	13.031	148.093
2004	笛鯛類	Snappers / Brownstripe	3	50.124	19.917	70.041
2004	黃鰭鮪	Yellowfin tuna	4.48	2626.9	25.41	2652.31
2004	黑口	Blackmouth croaker	3.96	67.858	218.867	286.725
2004	黑皮旗魚	Indo-Pacific blue marlin	4.39	2408.51	62.809	2471.32
2004	黑鮪	Bluefin tuna	4.05	580.896	0	580.896
2004	黑鯛	Blackhead seabream	3.24	372.99	453.546	826.536
2004	黑鯧	Black pomfret	2.93	660.778	221.679	882.457
2004	圓花鰹	Bullet tuna/Frigate tuna	4.27	4195.88	540.754	4736.63
2004	圓鰺	mackerel scad	3.4	7121.16	560.962	7682.12
2004	嘉臘	Red seabream	3.25	10223.4	650.397	10873.8
2004	劍旗魚	Swordfish	4.46	825.219	9.5	834.719
2004	盤仔	Threadfin porgy	3.27	195.374	120.106	315.48
2004	魷魚	Squids	4	26.641	19.999	46.64
2004	龍尖	Trumpet emperor	3.64	138.634	2.52	141.154
2004	闊腹鰆	Korean seerfish	4.21	872.903	297.705	1170.61
2004	鎖管	Neritic squids	4	3798.31	7005.54	10803.8
2004	鮸魚	Mi-iuy croaker	3.5	816.886	322.441	1139.33
2004	鯊條	Japanese topeshark	4	431.742	306.337	738.079
2004	鰈類	righteye flounders	3.79	235.882	52.046	287.928
2004	鰶	Japanese gizzard shad	2.35	0	35.6	35.6
2004	鱙仔	Japanese anchovy	1	314.105	65.493	379.598
2004	鱠	Malabar grouper	4.2	466.367	111.58	577.947
2004	鱸魚	Japanese seabass	3.36	32.783	9.346	42.129
2004	鸚哥魚	Blue-barred orange parrotfish/ Bicolor parrofish	2	64.601	9.614	74.215
2003	丁香	Silver-stripe round herring	3.06	838.78	0	838.78
2003	土拖鰆	Narrow barred spanish mackerel	4.48	2323.17	237.56	2560.73
2003	大目鮪	Bigeye tuna	3.72	683.208	0	683.208
2003	大黃魚	Large yellow croaker	4.48	47.64	31.621	79.261
2003	小黃魚	Small yellow croaker	3.63	451.197	29.834	481.031
2003	午仔魚	Blackspot threadfin	4.06	478.626	440.045	918.671
2003	正鰹	Skipjack tuna	3.32	2650.83	6088.46	8739.29
2003	甘仔鰺	Malabar trevally	4.47	2652.17	64.134	2716.3
2003	白皮旗魚	Black marlin	3.72	411.054	174.99	586.044
2003	白姑魚	Silver croaker	4.2	1215.77	12100.9	13316.7
2003	白帶魚	Hairtail/Largehead hairtail	3.99	4389.24	2342.92	6732.17
2003	白鯧	Silver pomfret	3.3	1664.48	283.873	1948.35
2003	尖鮻	Great barracuda	4.19	139.947	108.883	248.83
2003	肉魚	Japanese butterfish	4	2582.07	111.456	2693.52
2003	西刀	Dorab wolf herring	4.4	0.748	0.001	0.749
2003	沙鮻	Asian sillago	3.31	54.218	39.664	93.882
2003	赤海	Two-spot red snapper	3.74	11.298	4.352	15.65
2003	赤鯮	Yellow seabream	3.7	1193.73	1038.84	2232.58
2003	油魚	Oilfish	2.28	173.09	3	176.09
2003	狗母	Slender lizardfish	4.346	585.285	112.161	697.446
2003	花枝	Squids	3.5	932.731	353.699	1286.43
2003	花腹鯖	Blue mackerel	4.315	46433	7400.32	53833.3
2003	花鰹	Frigate tuna	4.315	447.436	243.21	690.646
2003	虱目魚	Milkfish fry	2.4	22.14	0	22.14
2003	金線魚	Golden thread	3.77	941.173	11.408	952.581
2003	長鰭鮪	Albacore	4.13	453.511	0	453.511
2003	雨傘旗魚	Indd-pacific sailfish	4.5	437.233	131.207	568.44
2003	青鱗	Sind sardinella	2.58	115.234	13.801	129.035
2003	扁甲鰺	Torpedo scad	3.91	105.661	19.258	124.919
2003	秋姑	Dash-and-dot goatfish	3.61	247.446	6.007	253.453
2003	紅目鰱	Red Big-eye	4.11	996.026	784.953	1780.98
2003	紅肉旗魚	Striped marlin	4.5	134.589	16.199	150.788
2003	紅尾鰺	Redtail scad	3.4	37.665	2.58	40.245
2003	飛魚	Whitefih flying fish	3.25	420.283	39.978	460.261
2003	剝皮魚	Unicorn leatherjacket filefish	3.49	1446.87	1710.42	3157.29
2003	海鯰	Sea catfish/Spotted sea catfish	3.36	102.81	60.054	162.864
2003	海鰻	White-margined moray	4.38	2664.98	180.25	2845.23
2003	海鱺	Cobia	4.26	2.34	96.442	98.782
2003	烏魚	Grey Mullet	2.48	122.754	201.234	323.988
2003	烏賊	Cuttle fishes	2.9	30.693	41.926	72.619
2003	臭肉鰮	Round herring	2.48	846.89	7.718	854.608
2003	馬加鰆	Japanese Spanish mackerel	4.38	284.611	193.523	478.134
2003	馬頭	Horsehead tilefish	3.4	319.81	64.903	384.713
2003	眼眶魚	Moonfish	3.45	949.329	6.44843	955.777
2003	章魚	Octopus	3.35	56.419	107.105	163.524
2003	笛鯛類	Snappers / Brownstripe	3	51.063	8.777	59.84
2003	黃鰭鮪	Yellowfin tuna	4.48	3235.94	30.71	3266.65
2003	黑口	Blackmouth croaker	3.96	110.829	353.829	464.658
2003	黑皮旗魚	Indo-Pacific blue marlin	4.39	2548.59	89.159	2637.74
2003	黑鮪	Bluefin tuna	4.05	846.101	0	846.101
2003	黑鯛	Blackhead seabream	3.24	371.901	434.817	806.718
2003	黑鯧	Black pomfret	2.93	811.89	273.337	1085.23
2003	圓花鰹	Bullet tuna/Frigate tuna	4.27	2340.12	507.948	2848.07
2003	圓鰺	mackerel scad	3.4	7824.79	553.69	8378.48
2003	嘉臘	Red seabream	3.25	11357.2	1289.21	12646.4
2003	劍旗魚	Swordfish	4.46	772.791	7.5	780.291
2003	盤仔	Threadfin porgy	3.27	149.158	89.958	239.116
2003	魷魚	Squids	4	21.782	26.423	48.205
2003	龍尖	Trumpet emperor	3.64	190.496	1.052	191.548
2003	闊腹鰆	Korean seerfish	4.21	1001.32	241.326	1242.65
2003	鎖管	Neritic squids	4	5621.19	5610.35	11231.5
2003	鮸魚	Mi-iuy croaker	3.5	1001.8	3100.78	4102.58
2003	鯊條	Japanese topeshark	4	518.153	625.491	1143.64
2003	鰈類	righteye flounders	3.79	144.1	44.095	188.195
2003	鰶	Japanese gizzard shad	2.35	0	65.5	65.5
2003	鱙仔	Japanese anchovy	1	332.239	43.406	375.645
2003	鱠	Malabar grouper	4.2	451.551	188.515	640.066
2003	鱸魚	Japanese seabass	3.36	39.709	13.737	53.446
2003	鸚哥魚	Blue-barred orange parrotfish/ Bicolor parrofish	2	31.045	7.732	38.777
2002	丁香	Silver-stripe round herring	3	754.702	0	754.702
2002	土拖鰆	Narrow barred spanish mackerel	4.48	25100	377.595	25477.6
2002	大目鮪	Bigeye tuna	3.72	571.096	0	571.096
2002	大黃魚	Large yellow croaker	4.48	85.989	21.692	107.681
2002	小黃魚	Small yellow croaker	3.63	584.459	49.714	634.173
2002	午仔魚	Blackspot threadfin	4.06	506.371	469.005	975.376
2002	正鰹	Skipjack tuna	3.32	1345.93	401.038	1746.97
2002	甘仔鰺	Malabar trevally	4.47	4568.47	45.121	4613.59
2002	白皮旗魚	Black marlin	3.72	182.593	172.417	355.01
2002	白姑魚	Silver croaker	4.2	1685.1	1251.9	2936.99
2002	白帶魚	Hairtail/Largehead hairtail	3.99	4722.83	1610.85	6333.68
2002	白鯧	Silver pomfret	3.3	3930.56	251.278	4181.84
2002	尖鮻	Great barracuda	4.19	160.489	103.059	263.548
2002	肉魚	Japanese butterfish	4	3089.23	121.289	3210.52
2002	西刀	Dorab wolf herring	4.4	14.854	0	14.854
2002	沙鮻	Asian sillago	3.31	63.548	162.077	225.625
2002	赤海	Two-spot red snapper	3.74	11.89	2.467	14.357
2002	油魚	Oilfish	2.28	252.142	0	252.142
2002	狗母	Slender lizardfish	4.346	437.138	109.294	546.432
2002	花枝	Squids	3.5	1164.5	295.392	1459.89
2002	花腹鯖	Blue mackerel	4.315	30561.7	4385.12	34946.9
2002	花鰹	Frigate tuna	4.315	413.869	162.466	576.335
2002	虱目魚	Milkfish fry	2.4	0.005	0.02	0.025
2002	金線魚	Golden thread	3.77	1019.29	11.229	1030.52
2002	長鰭鮪	Albacore	4.13	858.614	0	858.614
2002	雨傘旗魚	Indd-pacific sailfish	4.5	605.99	102.604	708.594
2002	青鱗	Sind sardinella	2.58	194.753	18.299	213.052
2002	扁甲鰺	Torpedo scad	3.91	203.642	25.499	229.141
2002	秋刀魚	Pacific saury	3.71	0	12.5	12.5
2002	秋姑	Dash-and-dot goatfish	3.61	339.583	4.909	344.492
2002	紅目鰱	Red Big-eye	4.11	1021.68	651.627	1673.31
2002	紅肉旗魚	Striped marlin	4.5	264.731	14.54	279.271
2002	紅尾鰺	Redtail scad	3.4	44.543	13.884	58.427
2002	飛魚	Whitefih flying fish	3.25	375.28	127.12	502.4
2002	剝皮魚	Unicorn leatherjacket filefish	3.49	360.952	961.055	1322.01
2002	海鯰	Sea catfish/Spotted sea catfish	3.36	60.134	132.926	193.06
2002	海鰻	White-margined moray	4.38	1308.38	140.157	1448.54
2002	海鱺	Cobia	4.26	0.316	64.913	65.229
2002	烏魚	Grey Mullet	2.48	671.175	262.65	933.825
2002	烏賊	Cuttle fishes	2.9	25.948	20.364	46.312
2002	臭肉鰮	Round herring	2.48	1507.3	18.443	1525.74
2002	馬加鰆	Japanese Spanish mackerel	4.38	334.48	126.88	461.359
2002	馬頭	Horsehead tilefish	3.4	264.84	41.066	305.906
2002	眼眶魚	Moonfish	3.45	1092.67	17.3417	1110.01
2002	章魚	Octopus	3.35	246.481	119.24	365.721
2002	笛鯛類	Snappers / Brownstripe	3	66.671	23.622	90.293
2002	黃鰭鮪	Yellowfin tuna	4.48	3026.57	27.251	3053.83
2002	黑口	Blackmouth croaker	3.96	153.137	381.515	534.652
2002	黑皮旗魚	Indo-Pacific blue marlin	4.39	2469.82	55.003	2524.82
2002	黑鮪	Bluefin tuna	4.05	486.867	0.291	487.158
2002	黑鯛	Blackhead seabream	3.24	408.298	375.86	784.158
2002	黑鯧	Black pomfret	2.93	983.231	199.016	1182.25
2002	圓花鰹	Bullet tuna/Frigate tuna	4.27	1620.28	101.388	1721.67
2002	圓鰺	mackerel scad	3.4	10040.5	114.53	10155.1
2002	嘉臘	Red seabream	3.25	13100.1	574.006	13674.1
2002	劍旗魚	Swordfish	4.46	1487.39	17.32	1504.71
2002	盤仔	Threadfin porgy	3.27	158.12	83.017	241.137
2002	魷魚	Squids	4	726.368	56.404	782.772
2002	龍尖	Trumpet emperor	3.64	185.749	2.278	188.027
2002	闊腹鰆	Korean seerfish	4.21	817.042	175.303	992.345
2002	鎖管	Neritic squids	4	5505.69	4388.8	9894.48
2002	鮸魚	Mi-iuy croaker	3.5	7168.68	286.311	7454.99
2002	鯊條	Japanese topeshark	4	391.221	414.446	805.667
2002	鰈類	righteye flounders	3.79	130.122	41.94	172.062
2002	鰶	Japanese gizzard shad	2.35	0	31.1	31.1
2002	鱠	Malabar grouper	4.2	452.594	204.35	656.944
2002	鱸魚	Japanese seabass	3.36	58.906	14.423	73.329
2002	鸚哥魚	Blue-barred orange parrotfish/ Bicolor parrofish	2	29.497	16.007	45.504
2001	丁香	Silver-stripe round herring	3.06	596.51	0	596.51
2001	土拖鰆	Narrow barred spanish mackerel	4.48	2927.23	322.522	3249.75
2001	大目鮪	Bigeye tuna	3.72	686.99	0	686.99
2001	大黃魚	Large yellow croaker	4.48	356.629	13.262	369.891
2001	小黃魚	Small yellow croaker	3.63	453.564	79.559	533.123
2001	午仔魚	Blackspot threadfin	4.06	681.014	564.794	1245.81
2001	正鰹	Skipjack tuna	3.32	1492.27	1516.03	3008.3
2001	甘仔鰺	Malabar trevally	4.47	3037.58	235.899	3273.48
2001	白皮旗魚	Black marlin	3.72	245.42	103.224	348.644
2001	白姑魚	Silver croaker	4.2	2029.03	1396.19	3425.22
2001	白帶魚	Hairtail/Largehead hairtail	3.99	4552.06	1724.63	6276.69
2001	白鯧	Silver pomfret	3.3	3988.48	256.223	4244.71
2001	尖鮻	Great barracuda	4.19	174.607	153.307	327.914
2001	肉魚	Japanese butterfish	4	3607.47	171.796	3779.26
2001	西刀	Dorab wolf herring	4.4	0.012	0.478	0.49
2001	沙鮻	Asian sillago	3.31	42.384	31.561	73.945
2001	赤海	Two-spot red snapper	3.74	7.908	8.067	15.975
2001	赤鯮	Yellow seabream	3.7	2422.56	879.143	3301.7
2001	油魚	Oilfish	2.28	110.611	0.077	110.688
2001	狗母	Slender lizardfish	4.346	668.898	104.359	773.257
2001	花枝	Squids	3.5	1735.1	363.011	2098.11
2001	花腹鯖	Blue mackerel	4.315	20755.3	3444.23	24199.6
2001	花鰹	Frigate tuna	4.315	564.288	422.275	986.563
2001	金線魚	Golden thread	3.77	1330.03	17.16	1347.19
2001	長鰭鮪	Albacore	4.13	713.197	0.005	713.202
2001	雨傘旗魚	Indd-pacific sailfish	4.5	586.01	155.47	741.48
2001	青鱗	Sind sardinella	2.58	50.016	212.362	262.378
2001	扁甲鰺	Torpedo scad	3.91	153.306	44.436	197.742
2001	秋刀魚	Pacific saury	3.71	0	14	14
2001	秋姑	Dash-and-dot goatfish	3.61	291.648	8.424	300.072
2001	紅目鰱	Red Big-eye	4.11	1693.37	737.793	2431.16
2001	紅肉旗魚	Striped marlin	4.5	114.974	34.09	149.064
2001	紅尾鰺	Redtail scad	3.4	555.307	42.587	597.894
2001	飛魚	Whitefih flying fish	3.25	210.129	155.5	365.629
2001	剝皮魚	Unicorn leatherjacket filefish	3.49	312.063	646.554	958.617
2001	海鯰	Sea catfish/Spotted sea catfish	3.36	91.02	127.957	218.977
2001	海鰻	White-margined moray	4.38	1500.5	268.221	1768.72
2001	海鱺	Cobia	4.26	1.858	17.628	19.486
2001	烏魚	Grey Mullet	2.48	1139.71	418.732	1558.44
2001	烏賊	Cuttle fishes	2.9	231.204	32.398	263.602
2001	臭肉鰮	Round herring	2.48	1169.65	36.677	1206.33
2001	馬加鰆	Japanese Spanish mackerel	4.38	287.221	201.693	488.914
2001	馬頭	Horsehead tilefish	3.4	446.447	65.621	512.068
2001	鬼頭刀	Common dolphinfish	4.48	6548.74	536.632	7085.38
2001	眼眶魚	Moonfish	3.45	1567.14	15.354	1582.49
2001	章魚	Octopus	3.35	85.538	130.277	215.815
2001	笛鯛類	Snappers / Brownstripe	3	56.285	14.323	70.608
2001	黃鰭鮪	Yellowfin tuna	4.48	3207.85	11.1008	3218.95
2001	黑口	Blackmouth croaker	3.96	277.748	365.838	643.586
2001	黑皮旗魚	Indo-Pacific blue marlin	4.39	11007.7	247.604	11255.3
2001	黑鮪	Bluefin tuna	4.05	580.227	0.745	580.972
2001	黑鯛	Blackhead seabream	3.24	419.1	443.565	862.665
2001	黑鯧	Black pomfret	2.93	1431.78	160.931	1592.71
2001	圓花鰹	Bullet tuna/Frigate tuna	4.27	889.333	211.934	1101.27
2001	圓鰺	mackerel scad	3.4	5672.22	551.613	6223.83
2001	嘉臘	Red seabream	3.25	8737.78	1045.45	9783.23
2001	劍旗魚	Swordfish	4.46	1645.21	73.685	1718.89
2001	盤仔	Threadfin porgy	3.27	167.9	96.615	264.515
2001	魩仔	Shorthead anchovy	1	49.326	645.397	694.723
2001	魷魚	Squids	4	741.991	40.251	782.242
2001	龍尖	Trumpet emperor	3.64	153.899	1.026	154.925
2001	闊腹鰆	Korean seerfish	4.21	1096.9	298.103	1395.01
2001	鎖管	Neritic squids	4	5791.14	3307.93	9099.07
2001	鮸魚	Mi-iuy croaker	3.5	2967.12	362.345	3329.47
2001	鯊條	Japanese topeshark	4	380.486	705.042	1085.53
2001	鰈類	righteye flounders	3.79	164.655	33.814	198.469
2001	鰶	Japanese gizzard shad	2.35	0	73.7	73.7
2001	鱙仔	Japanese anchovy	1	386.264	103.305	489.569
2001	鱝	Skates and rays	3.38833	121.674	92.21	213.884
2001	鱠	Malabar grouper	4.2	411.732	220.266	631.998
2001	鱸魚	Japanese seabass	3.36	61.265	18.643	79.908
2001	鸚哥魚	Blue-barred orange parrotfish/ Bicolor parrofish	2	20.623	5.949	26.572
2000	丁香	Silver-stripe round herring	3.06	639.46	0	639.46
2000	土拖鰆	Narrow barred spanish mackerel	4.48	1969.49	251.869	2221.36
2000	大目鮪	Bigeye tuna	3.72	1231.93	0	1231.93
2000	大黃魚	Large yellow croaker	4.48	344.598	87.535	432.133
2000	小黃魚	Small yellow croaker	3.63	336.4	11.21	347.61
2000	午仔魚	Blackspot threadfin	4.06	5594.34	431.296	6025.63
2000	正鰹	Skipjack tuna	3.32	1514.02	404.797	1918.81
2000	甘仔鰺	Malabar trevally	4.47	6119.01	235.875	6354.89
2000	白皮旗魚	Black marlin	3.72	222.309	167.601	389.91
2000	白姑魚	Silver croaker	4.2	2559.87	893.725	3453.6
2000	白帶魚	Hairtail/Largehead hairtail	3.99	2948.39	1058.9	4007.29
2000	白鯧	Silver pomfret	3.3	2225.14	626.669	2851.81
2000	尖鮻	Great barracuda	4.19	108.913	124.736	233.649
2000	肉魚	Japanese butterfish	4	2998.03	352.324	3350.36
2000	西刀	Dorab wolf herring	4.4	0.035	0.751	0.786
2000	沙鮻	Asian sillago	3.31	53.352	66.07	119.422
2000	赤海	Two-spot red snapper	3.74	29.317	13.436	42.753
2000	赤鯮	Yellow seabream	3.7	1723.04	805.987	2529.03
2000	油魚	Oilfish	2.28	351.651	1.614	353.265
2000	狗母	Slender lizardfish	4.346	1043.95	78.689	1122.64
2000	花枝	Squids	3.5	1932.31	280.65	2212.96
2000	花腹鯖	Blue mackerel	4.315	25589.2	3018.48	28607.7
2000	花鰹	Frigate tuna	4.315	472.038	484.189	956.227
2000	金線魚	Golden thread	3.77	1382.02	29.579	1411.6
2000	長鰭鮪	Albacore	4.13	742.875	0	742.875
2000	雨傘旗魚	Indd-pacific sailfish	4.5	433.156	155.687	588.843
2000	青鱗	Sind sardinella	2.58	187.835	48.641	236.476
2000	扁甲鰺	Torpedo scad	3.91	304.923	21.813	326.736
2000	秋姑	Dash-and-dot goatfish	3.61	470.174	7.154	477.328
2000	紅目鰱	Red Big-eye	4.11	2188.36	1196.47	3384.84
2000	紅肉旗魚	Striped marlin	4.5	160.026	36.1	196.126
2000	紅尾鰺	Redtail scad	3.4	3900.3	26.407	3926.7
2000	飛魚	Whitefih flying fish	3.25	142.735	144.383	287.118
2000	剝皮魚	Unicorn leatherjacket filefish	3.49	275.908	552.689	828.597
2000	海鯰	Sea catfish/Spotted sea catfish	3.36	104.262	115.25	219.512
2000	海鰻	White-margined moray	4.38	1834.1	184.857	2018.95
2000	海鱺	Cobia	4.26	2.082	8.889	10.971
2000	烏魚	Grey Mullet	2.48	1587.28	302.798	1890.07
2000	臭肉鰮	Round herring	2.48	903.982	33.99	937.972
2000	馬加鰆	Japanese Spanish mackerel	4.38	199.599	112.233	311.832
2000	馬頭	Horsehead tilefish	3.4	365.598	82.145	447.743
2000	鬼頭刀	Common dolphinfish	4.48	5133.58	370.235	5503.82
2000	眼眶魚	Moonfish	3.45	1477.69	17.117	1494.81
2000	章魚	Octopus	3.35	117.286	109.059	226.345
2000	笛鯛類	Snappers / Brownstripe	3	62.621	13.779	76.4
2000	黃鰭鮪	Yellowfin tuna	4.48	5075.53	8.552	5084.08
2000	黑口	Blackmouth croaker	3.96	287.887	162.154	450.041
2000	黑皮旗魚	Indo-Pacific blue marlin	4.39	4021.33	210.248	4231.58
2000	黑鮪	Bluefin tuna	4.05	1015.22	1.099	1016.32
2000	黑鯛	Blackhead seabream	3.24	397.179	320.564	717.743
2000	黑鯧	Black pomfret	2.93	940.247	161.533	1101.78
2000	圓花鰹	Bullet tuna/Frigate tuna	4.27	1829.9	273.307	2103.21
2000	圓鰺	mackerel scad	3.4	4202.93	184.027	4386.95
2000	嘉臘	Red seabream	3.25	9281.3	722.722	10004
2000	劍旗魚	Swordfish	4.46	1690.02	80.701	1770.72
2000	盤仔	Threadfin porgy	3.27	314.281	122.922	437.203
2000	魩仔	Shorthead anchovy	1	100.382	1067.67	1168.05
2000	魷魚	Squids	4	1115.71	50.722	1166.43
2000	龍尖	Trumpet emperor	3.64	170.654	0.616	171.27
2000	闊腹鰆	Korean seerfish	4.21	1021.13	228.041	1249.17
2000	鎖管	Neritic squids	4	4978.92	3393.91	8372.83
2000	鮸魚	Mi-iuy croaker	3.5	1026.08	453.407	1479.49
2000	鯊條	Japanese topeshark	4	721.796	341.697	1063.49
2000	鰈類	righteye flounders	3.79	91.004	46.303	137.307
2000	鰶	Japanese gizzard shad	2.35	0	21	21
2000	鱙仔	Japanese anchovy	1	313.217	2100.12	2413.34
2000	鱝	Skates and rays	3.38833	267.772	82.832	350.604
2000	鱠	Malabar grouper	4.2	477.653	206.958	684.611
2000	鱸魚	Japanese seabass	3.36	23.022	5.538	28.56
2000	鸚哥魚	Blue-barred orange parrotfish/ Bicolor parrofish	2	23.08	6.36	29.44
1999	丁香	Silver-stripe round herring	3.06	521	0	521
1999	土拖鰆	Narrow barred spanish mackerel	4.48	1683	257	1940
1999	大目鮪	Bigeye tuna	3.72	1553	0	1553
1999	大黃魚	Large yellow croaker	4.48	551	8	559
1999	小黃魚	Small yellow croaker	3.63	602	8	610
1999	午仔魚	Blackspot threadfin	4.06	609	456	1065
1999	正鰹	Skipjack tuna	3.32	1044	355	1399
1999	甘仔鰺	Malabar trevally	4.47	4719	163	4882
1999	白皮旗魚	Black marlin	3.72	316	150	466
1999	白姑魚	Silver croaker	4.2	2907	997	3904
1999	白帶魚	Hairtail/Largehead hairtail	3.99	3054	1299	4353
1999	白鯧	Silver pomfret	3.3	2308	168	2476
1999	尖鮻	Great barracuda	4.19	186	200	386
1999	肉魚	Japanese butterfish	4	3363	116	3479
1999	西刀	Dorab wolf herring	4.4	0	3	3
1999	沙鮻	Asian sillago	3.31	84	57	141
1999	赤海	Two-spot red snapper	3.74	22	8	30
1999	赤鯮	Yellow seabream	3.7	1048	1032	2080
1999	油魚	Oilfish	2.28	626	1	627
1999	狗母	Slender lizardfish	4.346	865	100	965
1999	花腹鯖	Blue mackerel	4.315	44117	1220	45337
1999	花鰹	Frigate tuna	4.315	613	862	1475
1999	金線魚	Golden thread	3.77	905	14	919
1999	長鰭鮪	Albacore	4.13	168	0	168
1999	雨傘旗魚	Indd-pacific sailfish	4.5	296	175	471
1999	青鱗	Sind sardinella	2.58	1	98	99
1999	扁甲鰺	Torpedo scad	3.91	94	19	113
1999	秋刀魚	Pacific saury	3.71	0	0	0
1999	秋姑	Dash-and-dot goatfish	3.61	468	6	474
1999	紅目鰱	Red Big-eye	4.11	1490	540	2030
1999	紅肉旗魚	Striped marlin	4.5	113	35	148
1999	紅尾鰺	Redtail scad	3.4	7587	46	7633
1999	飛魚	Whitefih flying fish	3.25	480	138	618
1999	剝皮魚	Unicorn leatherjacket filefish	3.49	272	725	997
1999	海鯰	Sea catfish/Spotted sea catfish	3.36	112	70	182
1999	海鰻	White-margined moray	4.38	2969	326	3295
1999	海鱺	Cobia	4.26	1	13	14
1999	烏魚	Grey Mullet	2.48	628	234	862
1999	烏賊	Cuttle fishes	4	1939	289	2228
1999	臭肉鰮	Round herring	2.48	864	29	893
1999	馬加鰆	Japanese Spanish mackerel	4.38	89	113	202
1999	馬頭	Horsehead tilefish	3.4	471	24	495
1999	鬼頭刀	Common dolphinfish	4.48	7835	495	8330
1999	眼眶魚	Moonfish	3.45	1733	13	1746
1999	章魚	Octopus	3.35	145	121	266
1999	笛鯛類	Snappers / Brownstripe	3	46	2	48
1999	黃鰭鮪	Yellowfin tuna	4.48	6139	25	6164
1999	黑口	Blackmouth croaker	3.96	51	172	223
1999	黑皮旗魚	Indo-Pacific blue marlin	4.39	3857	160	4017
1999	黑鮪	Bluefin tuna	4.05	1212	0	1212
1999	黑鯛	Blackhead seabream	3.24	269	335	604
1999	黑鯧	Black pomfret	2.93	789	89	878
1999	圓花鰹	Bullet tuna/Frigate tuna	4.27	2943	139	3082
1999	圓鰺	mackerel scad	3.4	20394	138	20532
1999	嘉臘	Red seabream	3.25	4815	512	5327
1999	劍旗魚	Swordfish	4.46	1481	57	1538
1999	盤仔	Threadfin porgy	3.27	156	172	328
1999	魩仔	Shorthead anchovy	1	94	889	983
1999	魷魚	Squids	4	905	32	937
1999	鮃鰈類	Flatfish /Indian halibut	3	111	33	144
1999	龍尖	Trumpet emperor	3.64	107	1	108
1999	闊腹鰆	Korean seerfish	4.21	1066	233	1299
1999	鎖管	Neritic squids	4	10536	547	11083
1999	鯊條	Japanese topeshark	4	577	388	965
1999	鰶	Japanese gizzard shad	2.35	0	27	27
1999	鱙仔	Japanese anchovy	1	226	425	651
1999	鱠	Malabar grouper	4.2	381	211	592
1999	鱸魚	Japanese seabass	3.36	29	17	46
1999	鸚哥魚	Blue-barred orange parrotfish/ Bicolor parrofish	2	5	0	5
1998	丁香	Silver-stripe round herring	3.06	886	0	886
1998	土拖鰆	Narrow barred spanish mackerel	4.48	1917	242	2159
1998	大目鮪	Bigeye tuna	3.72	2029	0	2029
1998	大黃魚	Large yellow croaker	4.48	306	4	310
1998	小黃魚	Small yellow croaker	3.63	689	10	699
1998	午仔魚	Blackspot threadfin	4.06	664	363	1027
1998	正鰹	Skipjack tuna	3.32	974	490	1464
1998	甘仔鰺	Malabar trevally	4.47	8147	82	8229
1998	白皮旗魚	Black marlin	3.72	253	158	411
1998	白姑魚	Silver croaker	4.2	2875	1204	4079
1998	白帶魚	Hairtail/Largehead hairtail	3.99	2495	1186	3681
1998	白鯧	Silver pomfret	3.3	1483	131	1614
1998	尖鲮	Asian sillago	4.19	353	202	555
1998	肉魚	Japanese butterfish	4	3118	163	3281
1998	西刀	Dorab wolf herring	4.4	1	0	1
1998	沙鲮	Silver sillago	3.31	82	64	146
1998	赤海	Two-spot red snapper	3.74	14	18	32
1998	赤鯮	Yellow seabream	3.7	1144	563	1707
1998	油魚	Oilfish	2.28	491	1	492
1998	狗母	Slender lizardfish	4.346	559	79	638
1998	花腹鯖	Blue mackerel	4.315	34446	1066	35512
1998	花鰹	Frigate tuna	4.315	1417	665	2082
1998	金線魚	Golden thread	3.77	864	5	869
1998	長鰭鮪	Albacore	4.13	124	0	124
1998	雨傘旗魚	Indd-pacific sailfish	4.5	635	390	1025
1998	青鱗	Sind sardinella	2.58	6	84	90
1998	扁甲鰺	Torpedo scad	3.91	978	678	1656
1998	秋刀魚	Pacific saury	3.71	0	0	0
1998	秋姑	Dash-and-dot goatfish	3.61	330	5	335
1998	紅目鰱	Red Big-eye	4.11	1279	1048	2327
1998	紅肉旗魚	Striped marlin	4.5	198	35	233
1998	紅尾鰺	Redtail scad	3.4	6126	31	6157
1998	飛魚	Whitefih flying fish	3.25	859	218	1077
1998	剝皮魚	Unicorn leatherjacket filefish	3.49	208	367	575
1998	海鯰	Sea catfish/Spotted sea catfish	3.36	144	65	209
1998	海鰻	White-margined moray	4.38	1875	266	2141
1998	海鱺	Cobia	4.26	1	13	14
1998	烏魚	Grey Mullet	2.48	359	248	607
1998	烏賊	Cuttle fishes	2.9	1951	224	2175
1998	臭肉鰮	Round herring	2.48	1204	45	1249
1998	馬加鰆	Japanese Spanish mackerel	4.38	106	112	218
1998	馬頭	Horsehead tilefish	3.4	359	13	372
1998	鬼頭刀	Common dolphinfish	4.48	15201	639	15840
1998	眼眶魚	Moonfish	3.45	984	11	995
1998	章魚	Octopus	3.35	222	204	426
1998	笛鯛類	Snappers / Brownstripe	3	33	0	33
1998	黃鰭鮪	Yellowfin tuna	4.48	5704	4	5708
1998	黑口	Blackmouth croaker	3.96	90	144	234
1998	黑皮旗魚	Indo-Pacific blue marlin	4.39	4813	100	4913
1998	黑鮪	Bluefin tuna	4.05	1216	0	1216
1998	黑鯛	Blackhead seabream	3.24	186	220	406
1998	黑鯧	Black pomfret	2.93	801	70	871
1998	圓花鰹	Bullet tuna/Frigate tuna	4.27	2423	115	2538
1998	圓鰺	mackerel scad	3.4	11543	547	12090
1998	嘉臘	Red seabream	3.25	8775	412	9187
1998	劍旗魚	Swordfish	4.46	1166	33	1199
1998	盤仔	Threadfin porgy	3.27	169	108	277
1998	魩仔	Shorthead anchovy	1	192	958	1150
1998	魷魚	Squids	4	900	44	944
1998	鮃鰈類	Flatfish /Indian halibut	3	116	23	139
1998	闊腹鰆	Korean seerfish	4.21	949	180	1129
1998	鎖管	Neritic squids	4	19159	915	20074
1998	鮸魚	Mi-iuy croaker	3.5	856	386	1242
1998	鯊條	Japanese topeshark	4	541	334	875
1998	籠尖	Longface emperor	3.64	107	0	107
1998	鰶	Japanese gizzard shad	2.35	0	12	12
1998	鱙仔	Japanese anchovy	1	399	26	425
1998	鱠	Malabar grouper	4.2	391	227	618
1998	鸚哥魚	Blue-barred orange parrotfish/ Bicolor parrofish	2	11	0	11
1997	丁香	Silver-stripe round herring	3.06	650	0	650
1997	土拖鰆	Narrow barred spanish mackerel	4.48	2388	229	2617
1997	大目鮪	Bigeye tuna	3.72	2128	0	2128
1997	大黃魚	Large yellow croaker	4.48	1095	11	1106
1997	小黃魚	Small yellow croaker	3.63	1118	6	1124
1997	午仔魚	Blackspot threadfin	4.06	627	330	957
1997	正鰹	Skipjack tuna	3.32	815	600	1415
1997	甘仔鰺	Malabar trevally	4.47	11332	101	11433
1997	白皮旗魚	Black marlin	3.72	322	85	407
1997	白姑魚	Silver croaker	4.2	3214	739	3953
1997	白帶魚	Hairtail/Largehead hairtail	3.99	2988	1214	4202
1997	白鯧	Silver pomfret	3.3	2598	104	2702
1997	尖鲮	Silver sillago	4.19	214	182	396
1997	肉魚	Japanese butterfish	4	3120	61	3181
1997	西刀	Dorab wolf herring	4.4	0	2	2
1997	沙鲮	Silver sillago	3.31	131	64	195
1997	赤海	Two-spot red snapper	3.74	11	19	30
1997	赤鯮	Yellow seabream	3.7	1717	473	2190
1997	油魚	Oilfish	2.28	493	2	495
1997	狗母	Slender lizardfish	4.346	742	78	820
1997	花腹鯖	Blue mackerel	4.315	44224	3033	47257
1997	花鰹	Frigate tuna	4.315	913	1005	1918
1997	金線魚	Golden thread	3.77	1131	5	1136
1997	長鰭鮪	Albacore	4.13	225	0	225
1997	雨傘旗魚	Indd-pacific sailfish	4.5	426	185	611
1997	青鱗	Sind sardinella	2.58	0	88	88
1997	扁甲鰺	Torpedo scad	3.91	6780	67	6847
1997	秋刀魚	Pacific saury	3.71	0	0	0
1997	秋姑	Dash-and-dot goatfish	3.61	415	5	420
1997	紅目鰱	Red Big-eye	4.11	2465	684	3149
1997	紅肉旗魚	Striped marlin	4.5	2100	38	2138
1997	紅尾鰺	Redtail scad	3.4	498	191	689
1997	飛魚	Whitefih flying fish	3.25	2274	222	2496
1997	剝皮魚	Unicorn leatherjacket filefish	3.49	173	272	445
1997	海鯰	Sea catfish/Spotted sea catfish	3.36	64	51	115
1997	海鰻	White-margined moray	4.38	1029	88	1117
1997	海鱺	Cobia	4.26	4	11	15
1997	烏魚	Grey Mullet	2.48	1597	650	2247
1997	烏賊	Cuttle fishes	4	2757	140	2897
1997	馬加鰆	Japanese Spanish mackerel	4.38	121	85	206
1997	馬頭	Horsehead tilefish	3.4	338	12	350
1997	鬼頭刀	Common dolphinfish	4.48	6980	714	7694
1997	眼眶魚	Moonfish	3.45	817	12	829
1997	章魚	Octopus	4	190	205	395
1997	笛鯛類	Snappers / Brownstripe	3	28	2	30
1997	黃鰭鮪	Yellowfin tuna	4.48	6151	38	6189
1997	黑口	Blackmouth croaker	3.96	229	59	288
1997	黑皮旗魚	Indo-Pacific blue marlin	4.39	4894	241	5135
1997	黑鮪	Bluefin tuna	4.05	1308	1	1309
1997	黑鯛	Blackhead seabream	3.24	130	146	276
1997	黑鯧	Black pomfret	2.93	1219	82	1301
1997	圓花鰹	Bullet tuna/Frigate tuna	4.27	1455	907	2362
1997	圓鰺	mackerel scad	3.4	1227	0	1227
1997	嘉臘	Red seabream	3.25	6608	544	7152
1997	劍旗魚	Swordfish	4.46	1430	59	1489
1997	盤仔	Threadfin porgy	3.27	226	89	315
1997	魩仔	Shorthead anchovy	1	133	932	1065
1997	魷魚	Squids	4	7100	13	7113
1997	鮃鰈類	Flatfish /Indian halibut	3	260	23	283
1997	龍尖	Trumpet emperor	3.64	94	0	94
1997	闊腹鰆	Korean seerfish	4.21	1417	190	1607
1997	鎖管	Neritic squids	4	18963	259	19222
1997	鮸魚	Mi-iuy croaker	3.5	1411	246	1657
1997	鯊條	Japanese topeshark	4	1212	290	1502
1997	鰶	Japanese gizzard shad	2.35	2	9	11
1997	鱙仔	Japanese anchovy	1	138	378	516
1997	鱠	Malabar grouper	4.2	404	172	576
1997	鱸魚	Japanese seabass	3.36	4	5	9
1997	鸚哥魚	Blue-barred orange parrotfish/ Bicolor parrofish	2	17	0	17
1996	丁香	Silver-stripe round herring	3.06	517	0	517
1996	土拖鰆	Narrow barred spanish mackerel	4.48	2100	417	2517
1996	大目鮪	Bigeye tuna	3.72	826	1	827
1996	大黃魚	Large yellow croaker	4.48	1508	48	1556
1996	小黃魚	Small yellow croaker	3.63	1304	0	1304
1996	午仔魚	Blackspot threadfin	4.06	677	5100	5777
1996	正鰹	Skipjack tuna	3.32	1167	834	2001
1996	甘仔鰺	Malabar trevally	4.47	6979	86	7065
1996	白皮旗魚	Black marlin	3.72	252	258	510
1996	白姑魚	Silver croaker	4.2	5033	880	5913
1996	白帶魚	Hairtail/Largehead hairtail	3.99	5279	1743	7022
1996	白鯧	Silver pomfret	3.3	5039	81	5120
1996	尖鮻	Great barracuda	4.19	234	148	382
1996	肉魚	Japanese butterfish	4	2942	46	2988
1996	西刀	Dorab wolf herring	4.4	0	1	1
1996	沙鮻	Asian sillago	3.31	184	79	263
1996	赤海	Two-spot red snapper	3.74	9	12	21
1996	赤鯮	Yellow seabream	3.7	1453	247	1700
1996	油魚	Oilfish	2.28	153	3	156
1996	狗母	Slender lizardfish	4.346	2115	65	2180
1996	花腹鯖	Blue mackerel	4.315	51982	1771	53753
1996	花鰹	Frigate tuna	4.315	118	1004	1122
1996	虱目魚	Milkfish fry	2.4	4	0	4
1996	金線魚	Golden thread	3.77	989	9	998
1996	長鰭鮪	Albacore	4.13	70	0	70
1996	雨傘旗魚	Indd-pacific sailfish	4.5	298	250	548
1996	青鱗	Sind sardinella	2.58	3	64	67
1996	扁甲鰺	Torpedo scad	3.91	210	23	233
1996	秋姑	Dash-and-dot goatfish	3.61	500	5	505
1996	紅目鰱	Red Big-eye	4.11	4019	1172	5191
1996	紅肉旗魚	Striped marlin	4.5	150	33	183
1996	紅尾鰺	Redtail scad	3.4	355	324	679
1996	飛魚	Whitefih flying fish	3.25	560	103	663
1996	剝皮魚	Unicorn leatherjacket filefish	3.49	373	444	817
1996	海鯰	Sea catfish/Spotted sea catfish	3.36	85	31	116
1996	海鰻	White-margined moray	4.38	1078	82	1160
1996	海鱺	Cobia	4.26	0	2	2
1996	烏魚	Grey Mullet	2.48	554	745	1299
1996	烏賊	Cuttle fishes	4	2479	200	2679
1996	臭肉鰮	Round herring	2.48	1413	50	1463
1996	馬加鰆	Japanese Spanish mackerel	4.38	433	110	543
1996	馬頭	Horsehead tilefish	3.4	1001	17	1018
1996	鬼頭刀	Common dolphinfish	4.48	2310	703	3013
1996	眼眶魚	Moonfish	3.45	709	13	722
1996	章魚	Octopus	3.35	157	108	265
1996	笛鯛類	Snappers / Brownstripe	3	26	11	37
1996	黃鰭鮪	Yellowfin tuna	4.48	6420	13	6433
1996	黑口	Blackmouth croaker	3.96	201	46	247
1996	黑皮旗魚	Indo-Pacific blue marlin	4.39	4379	285	4664
1996	黑鮪	Bluefin tuna	4.05	799	0	799
1996	黑鯛	Blackhead seabream	3.24	112	87	199
1996	黑鯧	Black pomfret	2.93	1425	118	1543
1996	圓花鰹	Bullet tuna/Frigate tuna	4.27	642	718	1360
1996	圓鰺	mackerel scad	3.4	4345	715	5060
1996	嘉臘	Red seabream	3.25	5484	530	6014
1996	劍旗魚	Swordfish	4.46	664	29	693
1996	盤仔	Threadfin porgy	3.27	253	83	336
1996	魩仔	Shorthead anchovy	1	149	983	1132
1996	魷魚	Squids	4	783	13	796
1996	鮃蝶類	Squids	3.5	196	17	213
1996	龍尖	Trumpet emperor	3.64	89	1	90
1996	闊腹鰆	Korean seerfish	4.21	1268	342	1610
1996	鎖管	Neritic squids	4	13876	977	14853
1996	鮸魚	Mi-iuy croaker	3.5	1896	214	2110
1996	鰶	Japanese gizzard shad	2.35	5	20	25
1996	鱙仔	Japanese anchovy	1	157	309	466
1996	鱠	Malabar grouper	4.2	532	142	674
1996	鱸魚	Japanese seabass	3.36	0	0	0
1996	鸚哥魚	Blue-barred orange parrotfish/ Bicolor parrofish	2	11	0	11
1995	丁香	Silver-stripe round herring	3.06	827	0	827
1995	土拖鰆	Narrow barred spanish mackerel	4.48	2715	455	3170
1995	大目鮪	Bigeye tuna	3.72	1255	1	1256
1995	大黃魚	Large yellow croaker	4.48	1721	190	1911
1995	小黃魚	Small yellow croaker	3.63	874	0	874
1995	午仔魚	Blackspot threadfin	4.06	594	499	1093
1995	正鰹	Skipjack tuna	3.32	907	943	1850
1995	甘仔鰺	Malabar trevally	4.47	6552	43	6595
1995	白皮旗魚	Black marlin	3.72	243	265	508
1995	白姑魚	Silver croaker	4.2	4466	963	5429
1995	白帶魚	Hairtail/Largehead hairtail	3.99	4358	2187	6545
1995	白鯧	Silver pomfret	3.3	6863	91	6954
1995	尖鮻	Great barracuda	4.19	194	158	352
1995	肉魚	Japanese butterfish	4	3407	34	3441
1995	西刀	Dorab wolf herring	4.4	0	3	3
1995	沙鮻	Asian sillago	3.31	169	118	287
1995	赤海	Two-spot red snapper	3.74	9	8	17
1995	赤鯮	Yellow seabream	3.7	1074	405	1479
1995	油魚	Oilfish	2.28	279	2	281
1995	狗母	Slender lizardfish	4.346	2115	41	2156
1995	花腹鯖	Blue mackerel	4.315	53189	948	54137
1995	花鰹	Frigate tuna	4.315	82	943	1025
1995	虱目魚	Milkfish fry	2.4	1	0	1
1995	金線魚	Golden thread	3.77	1151	7	1158
1995	長鰭鮪	Albacore	4.13	66	0	66
1995	雨傘旗魚	Indd-pacific sailfish	4.5	416	256	672
1995	青鱗	Sind sardinella	2.58	13	75	88
1995	扁甲鰺	Torpedo scad	3.91	45	19	64
1995	秋姑	Dash-and-dot goatfish	3.61	340	7	347
1995	紅目鰱	Red Big-eye	4.11	3446	1147	4593
1995	紅肉旗魚	Striped marlin	4.5	94	72	166
1995	紅尾鰺	Redtail scad	3.4	32	269	301
1995	飛魚	Whitefih flying fish	3.25	317	255	572
1995	剝皮魚	Unicorn leatherjacket filefish	3.49	977	690	1667
1995	海鯰	Sea catfish/Spotted sea catfish	3.36	107	39	146
1995	海鰻	White-margined moray	4.38	1209	59	1268
1995	海鱺	Cobia	4.26	0	2	2
1995	烏魚	Grey Mullet	2.48	1039	600	1639
1995	烏賊	Cuttle fishes	2.9	3561	383	3944
1995	臭肉鰮	Round herring	2.48	1615	38	1653
1995	馬加鰆	Japanese Spanish mackerel	4.38	278	222	500
1995	馬頭	Horsehead tilefish	3.4	542	22	564
1995	鬼頭刀	Common dolphinfish	4.48	10812	911	11723
1995	眼眶魚	Moonfish	3.45	839	20	859
1995	章魚	Octopus	3.35	166	88	254
1995	笛鯛類	Snappers / Brownstripe	3	26	3	29
1995	黃鰭鮪	Yellowfin tuna	4.48	9779	19	9798
1995	黑口	Blackmouth croaker	3.96	148	49	197
1995	黑皮旗魚	Indo-Pacific blue marlin	4.39	3858	913	4771
1995	黑鮪	Bluefin tuna	4.05	283	0	283
1995	黑鯛	Blackhead seabream	3.24	63	87	150
1995	黑鯧	Black pomfret	2.93	2577	239	2816
1995	圓花鰹	Bullet tuna/Frigate tuna	4.27	1092	1001	2093
1995	圓鰺	mackerel scad	3.4	3131	495	3626
1995	嘉臘	Red seabream	3.25	5857	461	6318
1995	劍旗魚	Swordfish	4.46	659	20	679
1995	盤仔	Threadfin porgy	3.27	265	64	329
1995	魩仔	Shorthead anchovy	1	487	2252	2739
1995	魷魚	Squids	4	547	11	558
1995	鮃蝶類	Squids	3.5	123	19	142
1995	龍尖	Trumpet emperor	3.64	72	0	72
1995	闊腹鰆	Korean seerfish	4.21	1465	347	1812
1995	鎖管	Neritic squids	4	11146	86	11232
1995	鮸魚	Mi-iuy croaker	3.5	1943	140	2083
1995	鯊條	Japanese topeshark	4	1163	578	1741
1995	鰶	Japanese gizzard shad	2.35	0	29	29
1995	鱙仔	Japanese anchovy	1	178	128	306
1995	鱠	Malabar grouper	4.2	541	100	641
1995	鱸魚	Japanese seabass	3.36	0	0	0
1995	鸚哥魚	Blue-barred orange parrotfish/ Bicolor parrofish	2	0	0	0
1994	丁香	Silver-stripe round herring	3.06	1127	0	1127
1994	土拖鰆	Narrow barred spanish mackerel	4.48	1745	658	2403
1994	大目鮪	Bigeye tuna	3.72	1575	2	1577
1994	大黃魚	Large yellow croaker	4.48	1572	10	1582
1994	小黃魚	Small yellow croaker	3.63	893	8	901
1994	午仔魚	Blackspot threadfin	4.06	804	334	1138
1994	正鰹	Skipjack tuna	3.32	877	866	1743
1994	甘仔鰺	Malabar trevally	4.47	8140	130	8270
1994	白皮旗魚	Black marlin	3.72	526	640	1166
1994	白姑魚	Silver croaker	4.2	5301	1181	6482
1994	白帶魚	Hairtail/Largehead hairtail	3.99	7004	1815	8819
1994	白鯧	Silver pomfret	3.3	3825	77	3902
1994	尖鲮	Silver sillago	4.19	204	273	477
1994	肉魚	Japanese butterfish	4	2894	9	2903
1994	西刀	Dorab wolf herring	4.4	1	0	1
1994	沙鲮	Silver sillago	3.31	174	86	260
1994	赤海	Two-spot red snapper	3.74	18	6	24
1994	赤鯮	Yellow seabream	3.7	1712	189	1901
1994	油魚	Oilfish	2.28	604	3	607
1994	狗母	Slender lizardfish	4.346	794	88	882
1994	花腹鯖	Blue mackerel	4.315	53518	1359	54877
1994	花鰹	Frigate tuna	4.315	43	1568	1611
1994	金線魚	Golden thread	3.77	1297	44	1341
1994	長鰭鮪	Albacore	4.13	75	0	75
1994	雨傘旗魚	Indd-pacific sailfish	4.5	692	620	1312
1994	青鱗	Sind sardinella	2.58	274	56	330
1994	扁甲鰺	Torpedo scad	3.91	40	167	207
1994	秋刀魚	Pacific saury	3.71	0	0	0
1994	秋姑	Dash-and-dot goatfish	3.61	380	7	387
1994	紅目鰱	Red Big-eye	4.11	1824	891	2715
1994	紅肉旗魚	Striped marlin	4.5	153	180	333
1994	紅尾鰺	Redtail scad	3.4	11	654	665
1994	飛魚	Whitefih flying fish	3.25	598	101	699
1994	剝皮魚	Unicorn leatherjacket filefish	3.49	301	503	804
1994	海鯰	Sea catfish/Spotted sea catfish	3.36	112	63	175
1994	海鰻	White-margined moray	4.38	3225	91	3316
1994	海鱺	Cobia	4.26	3	0	3
1994	烏魚	Grey Mullet	2.48	562	370	932
1994	烏賊	Cuttle fishes	2.9	3838	538	4376
1994	臭肉鰮	Round herring	2.48	1577	39	1616
1994	馬加鰆	Japanese Spanish mackerel	4.38	64	353	417
1994	馬頭	Horsehead tilefish	3.4	1200	40	1240
1994	鬼頭刀	Common dolphinfish	4.48	5760	939	6699
1994	眼眶魚	Moonfish	3.45	1693	131	1824
1994	章魚	Octopus	3.35	292	46	338
1994	笛鯛類	Snappers / Brownstripe	3	6	0	6
1994	黃鰭鮪	Yellowfin tuna	4.48	8188	8	8196
1994	黑口	Blackmouth croaker	3.96	247	73	320
1994	黑皮旗魚	Indo-Pacific blue marlin	4.39	3044	218	3262
1994	黑鮪	Bluefin tuna	4.05	465	0	465
1994	黑鯛	Blackhead seabream	3.24	21	91	112
1994	黑鯧	Black pomfret	2.93	1461	272	1733
1994	圓花鰹	Bullet tuna/Frigate tuna	4.27	43	411	454
1994	圓鰺	mackerel scad	3.4	2465	778	3243
1994	鲆鰈類	Flatfish /Indian halibut	3.5	94	27	121
1994	嘉臘	Red seabream	3.25	1176	396	1572
1994	劍旗魚	Swordfish	4.46	571	223	794
1994	盤仔	Threadfin porgy	3.27	280	100	380
1994	魩仔	Shorthead anchovy	1	669	979	1648
1994	魷魚	Squids	4	792	20	812
1994	龍尖	Trumpet emperor	3.64	35	0	35
1994	闊腹鰆	Korean seerfish	4.21	505	288	793
1994	鎖管	Neritic squids	4	10671	84	10755
1994	鮸魚	Mi-iuy croaker	3.5	1924	140	2064
1994	鯊條	Japanese topeshark	4	1496	331	1827
1994	鰈	Flatfish /Indian halibut	3.5	0	53	53
1994	鱙仔	Japanese anchovy	1	159	81	240
1994	鱠	Malabar grouper	4.2	339	107	446
1994	鸚哥魚	Blue-barred orange parrotfish/ Bicolor parrofish	2	0	0	0
1993	丁香	Silver-stripe round herring	3.06	624	0	624
1993	土拖鰆	Narrow barred spanish mackerel	4.48	11000	467	11467
1993	大目鮪	Bigeye tuna	3.72	1273	2	1275
1993	大黃魚	Large yellow croaker	4.48	482	7	489
1993	小黃魚	Small yellow croaker	3.63	517	1	518
1993	午仔魚	Blackspot threadfin	4.06	792	211	1003
1993	正鰹	Skipjack tuna	3.32	849	1045	1894
1993	甘仔鰺	Malabar trevally	4.47	9513	131	9644
1993	白皮旗魚	Black marlin	3.72	339	439	778
1993	白姑魚	Silver croaker	4.2	5011	1335	6346
1993	白帶魚	Hairtail/Largehead hairtail	3.99	8655	2830	11485
1993	白鯧	Silver pomfret	3.3	3975	111	4086
1993	尖鮻	Great barracuda	4.19	174	210	384
1993	肉魚	Japanese butterfish	4	3291	96	3387
1993	西刀	Dorab wolf herring	4.4	0	4	4
1993	沙鮻	Asian sillago	3.31	800	63	863
1993	赤海	Two-spot red snapper	3.74	18	8	26
1993	赤鯮	Yellow seabream	3.7	2187	129	2316
1993	油魚	Oilfish	2.28	949	1	950
1993	狗母	Slender lizardfish	4.346	2484	64	2548
1993	花腹鯖	Blue mackerel	4.315	40897	1012	41909
1993	花鰹	Frigate tuna	4.315	85	1172	1257
1993	金線魚	Golden thread	3.77	4538	57	4595
1993	長鰭鮪	Albacore	4.13	241	0	241
1993	雨傘旗魚	Indd-pacific sailfish	4.5	434	447	881
1993	青鱗	Sind sardinella	2.58	346	57	403
1993	扁甲鰺	Torpedo scad	3.91	170	284	454
1993	秋刀魚	Pacific saury	3.71	0	0	0
1993	秋姑	Dash-and-dot goatfish	3.61	293	11	304
1993	紅目鰱	Red Big-eye	4.11	1960	488	2448
1993	紅肉旗魚	Striped marlin	4.5	227	136	363
1993	紅尾鰺	Redtail scad	3.4	11	916	927
1993	飛魚	Whitefih flying fish	3.25	565	93	658
1993	剝皮魚	Unicorn leatherjacket filefish	3.49	700	990	1690
1993	海鯰	Sea catfish/Spotted sea catfish	3.36	280	120	400
1993	海鰻	White-margined moray	4.38	3392	82	3474
1993	海鱺	Cobia	4.26	0	6	6
1993	烏魚	Grey Mullet	2.48	1168	290	1458
1993	烏賊	Cuttle fishes	2.9	3341	418	3759
1993	臭肉鰮	Round herring	2.48	2109	35	2144
1993	馬加鰆	Japanese Spanish mackerel	4.38	170	277	447
1993	馬頭	Horsehead tilefish	3.4	1759	33	1792
1993	鬼頭刀	Common dolphinfish	4.48	8960	1231	10191
1993	眼眶魚	Moonfish	3.45	6071	100	6171
1993	章魚	Octopus	3.35	719	26	745
1993	笛鯛類	Snappers / Brownstripe	3	0	1	1
1993	黃鰭鮪	Yellowfin tuna	4.48	8722	46	8768
1993	黑口	Blackmouth croaker	3.96	2189	139	2328
1993	黑皮旗魚	Indo-Pacific blue marlin	4.39	3996	447	4443
1993	黑鮪	Bluefin tuna	4.05	419	0	419
1993	黑鯛	Blackhead seabream	3.24	49	92	141
1993	黑鯧	Black pomfret	2.93	1570	219	1789
1993	圓花鰹	Bullet tuna/Frigate tuna	4.27	77	914	991
1993	圓鰺	mackerel scad	3.4	1582	405	1987
1993	嘉臘	Red seabream	3.25	1411	222	1633
1993	劍旗魚	Swordfish	4.46	580	207	787
1993	盤仔	Threadfin porgy	3.27	222	44	266
1993	魩仔	Shorthead anchovy	1	685	471	1156
1993	魷魚	Squids	4	985	39	1024
1993	鮃鰈類	Flatfish /Indian halibut	3	78	36	114
1993	龍尖	Trumpet emperor	3.64	6	1	7
1993	闊腹鰆	Korean seerfish	4.21	244	342	586
1993	鎖管	Neritic squids	4	6491	1001	7492
1993	鮸魚	Mi-iuy croaker	3.5	120	68	188
1993	鯊條	Japanese topeshark	4	1475	318	1793
1993	鰶	Japanese gizzard shad	2.35	0	4	4
1993	鱙仔	Japanese anchovy	1	355	60	415
1993	鱠	Malabar grouper	4.2	325	107	432
1993	鱸魚	Japanese seabass	3.36	0	2	2
1993	鸚哥魚	Blue-barred orange parrotfish/ Bicolor parrofish	2	0	0	0
1992	丁香	Silver-stripe round herring	3.06	736	6	742
1992	土魠鰆	Narrow barred spanish mackerel	4.48	1372	737	2109
1992	大目鮪	Bigeye tuna	3.72	0	0	0
1992	大黃魚	Large yellow croaker	4.48	310	6	316
1992	小黃魚	Small yellow croaker	3.63	431	43	474
1992	午仔魚	Blackspot threadfin	4.06	961	258	1219
1992	正鰹	Skipjack tuna	3.32	289	1097	1386
1992	甘仔鰺	Malabar trevally	4.47	7775	114	7889
1992	白皮旗魚	Black marlin	3.72	788	1001	1789
1992	白姑魚	Silver croaker	4.2	4322	1056	5378
1992	白帶魚	Hairtail/Largehead hairtail	3.99	8155	2042	10197
1992	白鯧	Silver pomfret	3.3	3995	177	4172
1992	尖鮻	Great barracuda	4.19	190	150	340
1992	肉魚	Japanese butterfish	4	2553	248	2801
1992	西刀	Dorab wolf herring	4.4	0	13	13
1992	沙鮻	Asian sillago	3.31	587	98	685
1992	赤海	Two-spot red snapper	3.74	26	7	33
1992	赤鯮	Yellow seabream	3.7	2126	139	2265
1992	油魚	Oilfish	2.28	791	38	829
1992	狗母	Slender lizardfish	4.346	2919	98	3017
1992	花枝	Squids	3.5	2997	360	3357
1992	花腹鯖	Blue mackerel	4.315	42042	687	42729
1992	花鰹	Frigate tuna	4.315	114	884	998
1992	虱目魚	Milkfish fry	2.4	0	0	0
1992	金線魚	Golden thread	3.77	4316	33	4349
1992	長鰭鮪	Albacore	4.13	300	0	300
1992	雨傘旗魚	Indd-pacific sailfish	4.5	1095	465	1560
1992	青鱗	Sind sardinella	2.58	23	82	105
1992	扁甲鰺	Torpedo scad	3.91	51	169	220
1992	秋刀魚	Pacific saury	3.71	0	0	0
1992	秋姑	Dash-and-dot goatfish	3.61	365	6	371
1992	紅目鰱	Red Big-eye	4.11	1666	529	2195
1992	紅肉旗魚	Striped marlin	4.5	34	164	198
1992	紅尾鰺	Redtail scad	3.4	47	334	381
1992	飛魚	Whitefih flying fish	3.25	372	121	493
1992	剝皮魚	Unicorn leatherjacket filefish	3.49	124	1317	1441
1992	海鯰	Sea catfish/Spotted sea catfish	3.36	381	54	435
1992	海鰻	White-margined moray	4.38	3874	112	3986
1992	海鱺	Cobia	4.26	15	1	16
1992	烏魚	Grey Mullet	2.48	1988	385	2373
1992	烏賊	Cuttle fishes	2.9	0	0	0
1992	臭肉鰮	Round herring	2.48	1372	38	1410
1992	馬加鰆	Japanese Spanish mackerel	4.38	234	331	565
1992	馬頭	Horsehead tilefish	3.4	11008	168	11176
1992	鬼頭刀	Common dolphinfish	4.48	11817	1028	12845
1992	眼眶魚	Moonfish	3.45	6258	325	6583
1992	章魚	Octopus	3.35	290	44	334
1992	笛鯛類	Snappers / Brownstripe	3	0	5	5
1992	黃鰭鮪	Yellowfin tuna	4.48	7297	66	7363
1992	黑口	Blackmouth croaker	3.96	2221	156	2377
1992	黑皮旗魚	Indo-Pacific blue marlin	4.39	3913	465	4378
1992	黑鮪	Bluefin tuna	4.05	398	0	398
1992	黑鯛	Blackhead seabream	3.24	65	149	214
1992	黑鯧	Black pomfret	2.93	2228	261	2489
1992	圓花鰹	Bullet tuna/Frigate tuna	4.27	54	907	961
1992	圓鰺	mackerel scad	3.4	1723	216	1939
1992	嘉臘	Red seabream	3.25	1356	141	1497
1992	劍旗魚	Swordfish	4.46	34	299	333
1992	盤仔	Threadfin porgy	3.27	205	5	210
1992	魩仔	Shorthead anchovy	1	1288	521	1809
1992	魷魚	Squids	4	1911	142	2053
1992	鮃蝶類	Squids	3	222	51	273
1992	龍尖	Trumpet emperor	3.64	89	1	90
1992	闊腹鰆	Korean seerfish	4.21	320	354	674
1992	鮸魚	Mi-iuy croaker	3.5	479	100	579
1992	鯊條	Japanese topeshark	4	1459	201	1660
1992	鰶	Japanese gizzard shad	2.35	0	0	0
1992	鱙仔	Japanese anchovy	1	408	287	695
1992	鱠	Malabar grouper	4.2	300	116	416
1992	鱸魚	Japanese seabass	3.36	95	0	95
1992	鸚哥魚	Blue-barred orange parrotfish/ Bicolor parrofish	2	0	0	0
1991	丁香	Silver-stripe round herring	3.06	504	27	531
1991	土魠鰆	Narrow barred spanish mackerel	4.48	452	484	936
1991	大目鮪	Bigeye tuna	3.72	1129	0	1129
1991	大黃魚	Large yellow croaker	4.48	260	0	260
1991	小黃魚	Small yellow croaker	3.63	271	60	331
1991	午仔魚	Blackspot threadfin	4.06	836	362	1198
1991	正鰹	Skipjack tuna	3.32	1451	883	2334
1991	甘仔鰺	Malabar trevally	4.47	38	94	132
1991	白皮旗魚	Black marlin	3.72	806	522	1328
1991	白姑魚	Silver croaker	4.2	3225	713	3938
1991	白帶魚	Hairtail/Largehead hairtail	3.99	9619	2600	12219
1991	白鯧	Silver pomfret	3.3	4168	265	4433
1991	尖鮻	Great barracuda	4.19	177	49	226
1991	肉魚	Japanese butterfish	4	3861	243	4104
1991	西刀	Dorab wolf herring	4.4	2	2	4
1991	沙鮻	Asian sillago	3.31	1026	147	1173
1991	赤海	Two-spot red snapper	3.74	62	10	72
1991	赤鯮	Yellow seabream	3.7	502	119	621
1991	油魚	Oilfish	2.28	2566	46	2612
1991	狗母	Slender lizardfish	4.346	3085	127	3212
1991	花枝	Squids	3.5	4257	400	4657
1991	花腹鯖	Blue mackerel	4.315	28609	695	29304
1991	花鰹	Frigate tuna	4.315	383	1002	1385
1991	虱目魚	Milkfish fry	2.4	0	0	0
1991	金線魚	Golden thread	3.77	5059	34	5093
1991	長鰭鮪	Albacore	4.13	341	0	341
1991	雨傘旗魚	Indd-pacific sailfish	4.5	886	1072	1958
1991	青鱗	Sind sardinella	2.58	18	105	123
1991	扁甲鰺	Torpedo scad	3.91	42	128	170
1991	秋刀魚	Pacific saury	3.71	0	0	0
1991	秋姑	Dash-and-dot goatfish	3.61	316	6	322
1991	紅目鰱	Red Big-eye	4.11	2237	388	2625
1991	紅肉旗魚	Striped marlin	4.5	366	174	540
1991	紅尾鰺	Redtail scad	3.4	4687	199	4886
1991	飛魚	Whitefih flying fish	3.25	403	217	620
1991	剝皮魚	Unicorn leatherjacket filefish	3.49	534	570	1104
1991	海鯰	Sea catfish/Spotted sea catfish	3.36	57	53	110
1991	海鰻	White-margined moray	4.38	4622	117	4739
1991	海鱺	Cobia	4.26	3	0	3
1991	烏魚	Grey Mullet	2.48	513	144	657
1991	烏賊	Cuttle fishes	2.9	0	0	0
1991	臭肉鰮	Round herring	2.48	1636	82	1718
1991	馬加鰆	Japanese Spanish mackerel	4.38	174	317	491
1991	馬頭	Horsehead tilefish	3.4	230	113	343
1991	鬼頭刀	Common dolphinfish	4.48	7798	1004	8802
1991	眼眶魚	Moonfish	3.45	2758	81	2839
1991	章魚	Octopus	3.35	294	46	340
1991	笛鯛類	Snappers / Brownstripe	3	10	6	16
1991	黃鰭鮪	Yellowfin tuna	4.48	6629	33	6662
1991	黑口	Blackmouth croaker	3.96	1000	237	1237
1991	黑皮旗魚	Indo-Pacific blue marlin	4.39	2352	344	2696
1991	黑鮪	Bluefin tuna	4.05	249	0	249
1991	黑鯛	Blackhead seabream	3.24	57	197	254
1991	黑鯧	Black pomfret	2.93	1979	357	2336
1991	圓花鰹	Bullet tuna/Frigate tuna	4.27	35	511	546
1991	圓鰺	mackerel scad	3.4	1532	215	1747
1991	嘉臘	Red seabream	3.25	715	244	959
1991	劍旗魚	Swordfish	4.46	424	209	633
1991	盤仔	Threadfin porgy	3.27	181	12	193
1991	魩仔	Shorthead anchovy	1	896	641	1537
1991	魷魚	Squids	4	7045	15	7060
1991	鮃蝶類	Squids	3.5	224	25	249
1991	龍尖	Trumpet emperor	3.64	129	2	131
1991	闊腹鰆	Korean seerfish	4.21	282	344	626
1991	鮸魚	Mi-iuy croaker	3.5	500	80	580
1991	鯊條	Japanese topeshark	4	1805	152	1957
1991	鱙仔	Japanese anchovy	1	939	512	1451
1991	鱠	Malabar grouper	4.2	373	129	502
1991	鱸魚	Japanese seabass	3.36	452	0	452
1991	鸚哥魚	Blue-barred orange parrotfish/ Bicolor parrofish	2	0	0	0
1990	丁香	Silver-stripe round herring	3.06	521	0	521
1990	土拖鰆	Narrow barred spanish mackerel	4.48	1685	257	1942
1990	大目鮪	Bigeye tuna	3.72	1553	0	1553
1990	大黃魚	Large yellow croaker	4.48	551	8	559
1990	大鯊	Sharks	3.64	6244	77	6321
1990	小黃魚	Small yellow croaker	3.63	601	7	608
1990	午仔魚	Blackspot threadfin	4.06	609	456	1065
1990	正鰹	Skipjack tuna	3.32	1045	355	1400
1990	甘仔鰺	Malabar trevally	4.47	1719	163	1882
1990	白皮旗魚	Black marlin	3.72	316	150	466
1990	白姑魚	Silver croaker	4.2	2908	997	3905
1990	白帶魚	Hairtail/Largehead hairtail	3.99	3054	1299	4353
1990	白鯧	Silver pomfret	3.3	2307	168	2475
1990	皮刀	Moonfish	3.45	1731	16	1747
1990	尖鮻	Great barracuda	4.19	186	201	387
1990	肉魚	Japanese butterfish	4	3363	116	3479
1990	西刀	Dorab wolf herring	4.4	0	3	3
1990	沙鮻	Asian sillago	3.31	83	57	140
1990	赤海	Two-spot red snapper	3.74	22	9	31
1990	油魚	Oilfish	2.28	625	1	626
1990	狗母	Slender lizardfish	4.346	864	76	940
1990	花腹鯖	Blue mackerel	4.315	44120	1219	45339
1990	花鰹	Frigate tuna	4.315	613	863	1476
1990	金線	Golden thread	3.8	906	14	920
1990	長鰭鮪	Albacore	4.13	168	0	168
1990	雨傘旗魚	Indd-pacific sailfish	4.5	296	176	472
1990	青鱗	Sind sardinella	2.58	1	98	99
1990	扁甲鰺	Torpedo scad	3.91	94	19	113
1990	秋刀魚	Pacific saury	3.71	0	0	0
1990	秋姑	Dash-and-dot goatfish	3.61	467	6	473
1990	紅目鰱	Red Big-eye	4.11	1490	539	2029
1990	紅肉旗魚	Striped marlin	4.5	112	34	146
1990	紅尾鰺	Redtail scad	3.4	7658	45	7703
1990	飛魚	Whitefih flying fish	3.25	480	138	618
1990	剝皮魚	Unicorn leatherjacket filefish	3.49	271	724	995
1990	海鯰	Sea catfish/Spotted sea catfish	3.36	112	70	182
1990	海鰻	White-margined moray	4.38	2970	326	3296
1990	海鱺	Cobia	4.26	1	13	14
1990	烏魚	Grey Mullet	2.48	328	235	563
1990	真鰺	Japanese jack mackerel	3.4	2588	73	2661
1990	臭肉鰮	Round herring	2.48	864	29	893
1990	馬加鰆	Japanese Spanish mackerel	4.38	89	114	203
1990	馬頭	Horsehead tilefish	3.4	472	24	496
1990	鬼頭刀	Common dolphinfish	4.48	7835	495	8330
1990	章魚	Octopus	3.35	145	121	266
1990	笛鯛類	Snappers / Brownstripe	3	46	3	49
1990	黃鰭鮪	Yellowfin tuna	4.48	6139	25	6164
1990	黑口	Blackmouth croaker	3.96	51	172	223
1990	黑皮旗魚	Indo-Pacific blue marlin	4.39	3857	161	4018
1990	黑鮪	Bluefin tuna	4.05	1212	0	1212
1990	黑鮪	Bluefin tuna	4.05	0	0	0
1990	黑鯛	Blackhead seabream	3.24	269	335	604
1990	黑鯧	Black pomfret	2.93	788	88	876
1990	圓花鰹	Bullet tuna/Frigate tuna	4.27	2943	139	3082
1990	圓鰺	mackerel scad	3.4	20394	137	20531
1990	嘉臘	Red seabream	3.25	1939	288	2227
1990	劍旗魚	Swordfish	4.46	1481	56	1537
1990	魩仔	Shorthead anchovy	1	94	888	982
1990	魷魚	Squids	4	905	32	937
1990	龍尖	Trumpet emperor	3.64	108	1	109
1990	闊腹鰆	Korean seerfish	4.21	1065	233	1298
1990	鎖管	Neritic squids	4	10536	547	11083
1990	鮸魚	Mi-iuy croaker	3.5	1018	303	1321
1990	鯊條	Japanese topeshark	4	576	387	963
1990	鰶	Japanese gizzard shad	2.35	0	27	27
1990	鱈魚	Formosa grenadier	3.5	0	0	0
1990	鱙仔	Japanese anchovy	1	226	424	650
1990	鱝	Skates and rays	3.38833	149	86	235
1990	鱠	Malabar grouper	4.2	381	211	592
1990	鱸魚	Japanese seabass	3.36	29	17	46
1990	鸚哥魚	Blue-barred orange parrotfish/ Bicolor parrofish	2	5	0	5
1988	大目鮪	Bigeye tuna	3.72	1455	0	1455
1988	大鯊	Sharks	3.64	5907	17	5924
1988	午仔魚	Blackspot threadfin	4.06	2013	288	2301
1988	正鰹	Skipjack tuna	3.32	7102	188	7290
1988	正鰹	Skipjack tuna	3.32	738	530	1268
1988	白皮旗魚	Black marlin	3.72	1616	69	1685
1988	白姑魚	Silver croaker	4.2	5714	644	6358
[truncated: 1,091 more rows]
